# Supplementary material for: Systematic generation of high-resolution deletion coverage of the Drosophila melanogaster genome
Source: Springer Nature journal article supplement (doi:10.1038/ng1312), 2004-02-22
Supplement: ng1312-S1.pdf [file ng1312-S1.pdf]

## Supplementary Methods

### Primers for screening FLP/FRT deletion stocks by PCR

#### Hybrid PCR (Transposon-specific primers facing inward)

| w+/w- | left isolate | right isolate | left primer               | right primer              | fragment size |
|-------|--------------|---------------|---------------------------|---------------------------|---------------|
| w-    | XP5' plus    | WH5' minus    | AATGATTTCGCAGTGAAGGCT     | GACGCATGATTATCTTTTACGTGAC | 1.8kb         |
| w-    | WH5' plus    | XP5' minus    | GACGCATGATTATCTTTTACGTGAC | AATGATTTCGCAGTGAAGGCT     | 1.8kb         |
| w-    | XP5' plus    | RB3' plus     | AATGATTTCGCAGTGAAGGCT     | TGCATTTGCCTTTTCGCCTTAT    | 1.7kb         |
| w-    | RB3' minus   | XP5' minus    | TGCATTTGCCTTTTCGCCTTAT    | AATGATTTCGCAGTGAAGGCT     | 1.7kb         |
| w+    | RB5' plus    | WH5' minus    | GACGCATGATTATCTTTTACGTGAC | GACGCATGATTATCTTTTACGTGAC | 6.1kb         |
| w+    | WH5' plus    | RB5' minus    | GACGCATGATTATCTTTTACGTGAC | GACGCATGATTATCTTTTACGTGAC | 6.1kb         |
| w+    | RB3' minus   | WH3' plus     | TGCATTTGCCTTTTCGCCTTAT    | TGCATTTGCCTTTTCGCCTTAT    | 7.3kb         |
| w+    | WH3' minus   | RB3' plus     | TGCATTTGCCTTTTCGCCTTAT    | TGCATTTGCCTTTTCGCCTTAT    | 7.3kb         |

#### Two-sided PCR (Transposon-specific primers facing outward)

| w+/w- | left isolate | right isolate | left primer                 | right primer                | fragment size |
|-------|--------------|---------------|-----------------------------|-----------------------------|---------------|
| w+    | XP3' minus   | WH3' plus     | TACTATTCCTTTCACTCGCACTTATTG | CCTCGATATACAGACCGATAAAAC    | variable      |
| w+    | XP3' minus   | RB5' minus    | TACTATTCCTTTCACTCGCACTTATTG | TCCAAGCGGCGACTGAGATG        | variable      |
| w+    | WH3' minus   | XP3' plus     | CCTCGATATACAGACCGATAAAAC    | TACTATTCCTTTCACTCGCACTTATTG | variable      |
| w+    | RB5' plus    | XP3' plus     | TCCAAGCGGCGACTGAGATG        | TACTATTCCTTTCACTCGCACTTATTG | variable      |
| w+    | RB5' plus    | RB3' plus     | TCCAAGCGGCGACTGAGATG        | CCTCGATATACAGACCGATAAAAC    | variable      |
| w+    | WH5' plus    | WH3' plus     | TCCAAGCGGCGACTGAGATG        | CCTCGATATACAGACCGATAAAAC    | variable      |
| w+    | RB3' minus   | RB5' minus    | CCTCGATATACAGACCGATAAAAC    | TCCAAGCGGCGACTGAGATG        | variable      |
| w+    | WH3' minus   | WH5' minus    | CCTCGATATACAGACCGATAAAAC    | TCCAAGCGGCGACTGAGATG        | variable      |
| w+    | XP5' plus    | XP3' plus     | TTTACTCCAGTCACAGCTTTG       | TACTATTCCTTTCACTCGCACTTATTG | variable      |
| w+    | XP3' minus   | XP5' minus    | TACTATTCCTTTCACTCGCACTTATTG | TTTACTCCAGTCACAGCTTTG       | variable      |
| w+    | RB3' minus   | WH3' plus     | CCTCGATATACAGACCGATAAAAC    | CCTCGATATACAGACCGATAAAAC    | variable      |
| w+    | WH3' minus   | RB3' plus     | CCTCGATATACAGACCGATAAAAC    | CCTCGATATACAGACCGATAAAAC    | variable      |
| w+    | WH5' plus    | RB5' minus    | TCCAAGCGGCGACTGAGATG        | TCCAAGCGGCGACTGAGATG        | variable      |
| w+    | RB5' plus    | WH5' minus    | TCCAAGCGGCGACTGAGATG        | TCCAAGCGGCGACTGAGATG        | variable      |

#### 96-well 5 Fly Genomic Prep

- 1) Place 5 flies per well in a 96-well flat bottom plate on ice.
- 2) Homogenize flies in 100  $\mu$ L Buffer A using Burkard Scientific Multiple Homogenizer or other compatible homogenizer, cover and incubate at 65°C 15 min.
- 3) Quick spin to pull down condensation. Add 100  $\mu$ L 3M KOAc, cover, mix and put on ice for 10 min.
- 4) Spin 20 min @ 2000 RCF.
- 5) Transfer 150  $\mu$ L supernatant with 12 channel pipet with aerosol barrier tips to 96-deep well block.
- 6) Add 90  $\mu$ L cold isopropanol, cover, mix about 1min, incubate @ RT for 5 min.
- 7) Spin for 30 min @ 2000 RCF @ 4°C
- 8) Pour out supernatant then invert on paper towel briefly.
- 9) Add 200  $\mu$ L cold 70% EtOH, cover, spin for 10 min @ 2000 RCF @ 4°C
- 10) Pour out supernatant then invert on paper towel briefly.
- 11) Speed vacuum to dry on medium heat, about 10-15 min (look to make sure all EtOH is gone).
- 12) Add 100  $\mu$ L TE, mix, put in 65°C H<sub>2</sub>O bath 15-20 min to resuspend. Mix again then quick spin to pull down all liquid.
- 13) Transfer to 96-well round bottom plate with a 12 channel pipet using aerosol barrier tips, and seal for storage at -80°C.

#### Buffer A

100 mM TrisHCl 7.6  
100 mM EDTA

100 mM NaCl  
0.5% SDS
