# Supplementary material for: Systematic generation of high-resolution deletion coverage of the Drosophila melanogaster genome
Source: Springer Nature journal article supplement (doi:10.1038/ng1312), 2004-02-22
Supplement: ng1312-S2.pdf [file ng1312-S2.pdf]

Supplementary Table 1. Deletions generated at Bloomington between *trans*-heterozygous P element insertions

| Deletion <sup>1</sup> | Polytene Cytology | Left P insertion                          | Right P insertion                         | Flanks<br>haploinsufficient or<br>ribosomal protein<br>gene | Designed to provide coverage              |
|-----------------------|-------------------|-------------------------------------------|-------------------------------------------|-------------------------------------------------------------|-------------------------------------------|
| <i>Df(2L)BSC4</i>     | 21B7-C1;21C2-3    | <i>P{lacW}Rpp30<sup>k01901</sup></i>      | <i>P{PZ}α-Adaptin<sup>06694</sup></i>     | <i>RpP2</i>                                                 | <i>Df(2L)net-PMF</i> to <i>RpP2</i>       |
| <i>Df(2L)BSC16</i>    | 21C3-4;21C6-8     | <i>P{lacW}ex<sup>k12193</sup></i>         | <i>P{PZ}ds<sup>05142</sup></i>            | <i>RpP2</i>                                                 | <i>RpP2</i> to <i>Df(2L)ast2</i>          |
| <i>Df(2L)BSC37</i>    | 22D1-3;22F1-2     | <i>P{PZ}aop<sup>03953a</sup></i>          | <i>P{EP}dpp<sup>EP2232</sup></i>          | <i>dpp</i>                                                  | <i>Df(2L)dp-79b</i> to <i>dpp</i>         |
| <i>Df(2L)BSC28</i>    | 23C5-D1;23E2      | <i>P{PZ}toc<sup>01361</sup></i>           | <i>P{EP}EP2297</i>                        |                                                             | <i>Df(2L)JS17</i> to <i>Df(2L)BSC31</i>   |
| <i>Df(2L)BSC31</i>    | 23E5;23F4-5       | <i>P{EP}EP2297</i>                        | <i>P{PZ}l(2)06270<sup>06270</sup></i>     |                                                             | <i>Df(2L)BSC28</i> to <i>Df(2L)drm-P2</i> |
| <i>Df(2L)BSC5</i>     | 26B1-2;26D1-2     | <i>P{PZ}eIF-4a<sup>02349</sup></i>        | <i>P{lacW}l(2)k09923<sup>k09923</sup></i> |                                                             | <i>Df(2L)E110</i> to <i>Df(2L)BSC6</i>    |
| <i>Df(2L)BSC6</i>     | 26D3-E1;26F4-7    | <i>P{lacW}l(2)k09923<sup>k09923</sup></i> | <i>P{PZ}cup<sup>01355</sup></i>           |                                                             | <i>Df(2L)BSC5</i> to <i>Df(2L)BSC7</i>    |
| <i>Df(2L)BSC9</i>     | 26F5-7;27A2-B2    | <i>P{PZ}cup<sup>01355</sup></i>           | <i>P{lacW}l(2)k13315<sup>k13315</sup></i> | Unidentified<br>dominant female<br>sterile                  | <i>Df(2L)BSC6</i> to female sterile       |
| <i>Df(2L)BSC41</i>    | 28A4-B1;28D3-9    | <i>P{lacW}l(2)k05404<sup>k05404</sup></i> | <i>P{EP}EP946</i>                         | <i>CG7424</i>                                               | <i>Df(2L)XE-3801</i> to <i>CG7424</i>     |
| <i>Df(2L)BSC17</i>    | 30C3-5;30F1       | <i>P{PZ}pelo<sup>1</sup></i>              | <i>P{EP}Dref<sup>EP460</sup></i>          | <i>RpL13</i>                                                | <i>Df(2L)N22-14</i> to <i>RpL13</i>       |
| <i>Df(2L)BSC32</i>    | 32A1-2;32C5-D1    | <i>P{PZ}dbf<sup>1</sup></i>               | <i>P{lacW}l(2)k05812<sup>k05812</sup></i> | <i>RpL9</i>                                                 | <i>Df(2L)J2</i> to <i>RpL9</i>            |
| <i>Df(2L)BSC36</i>    | 32D1;32D4-E1      | <i>P{PZ}Nup154<sup>01501</sup></i>        | <i>P{GT1}BG00672</i>                      | <i>RpL9</i>                                                 | <i>RpL9</i> to <i>Df(2L)FCK-20</i>        |
| <i>Df(2L)BSC30</i>    | 34A3;34B7-9       | <i>P{PZ}kek1<sup>01433</sup></i>          | <i>P{lacW}l(2)k00302<sup>k00302</sup></i> | <i>CG9282</i>                                               | <i>Df(2L)Prl</i> to <i>CG9282</i>         |
| <i>Df(2R)BSC29</i>    | 45D3-4;45F2-6     | <i>P{PZ}l(2)03659<sup>03659</sup></i>     | <i>P{lacW}l(2)k09501<sup>k09501</sup></i> | <i>RpL31</i>                                                | <i>Df(2R)w45-30n</i> to <i>RpL31</i>      |

|                    |                   |                                              |                                            |                          |                                                                 |
|--------------------|-------------------|----------------------------------------------|--------------------------------------------|--------------------------|-----------------------------------------------------------------|
| <i>Df(2R)BSC25</i> | 48B7-C1;48C2-4    | <i>P{lacW}wat</i> <sup>k14026</sup>          | <i>P{PZ}Cct5</i> <sup>06444</sup>          |                          |                                                                 |
| <i>Df(2R)BSC39</i> | 48C5-D1;48D5-E1   | <i>P{PZ}Eflalpha48D</i> <sup>01275</sup>     | <i>P{GT1}Rep1</i> <sup>BG01033</sup>       |                          | <i>Df(2R)en30</i> to <i>Df(2R)BSC40</i>                         |
| <i>Df(2R)BSC40</i> | 48E1-2;48E2-10    | <i>P{GT1}Rep1</i> <sup>BG01033</sup>         | <i>P{PZ}Cct5</i> <sup>06444</sup>          | CG8857                   | <i>Df(2R)BSC39</i> to CG8857                                    |
| <i>Df(2R)BSC3</i>  | 48E12-F4;49A11-B6 | <i>P{PZ}Cam</i> <sup>03909</sup>             | <i>P{lacW}k15501</i>                       | CG8857                   | CG8857 to <i>Df(2R)vg-C</i>                                     |
| <i>Df(2R)BSC18</i> | 50D1;50D2-7       | <i>P{lacW}mam</i> <sup>k02214</sup>          | <i>P{EP}EP993</i>                          | CG8415 and <i>mRpS16</i> | <i>Df(2R)CX1</i> to CG8415                                      |
| <i>Df(2R)BSC11</i> | 50E6-F1;51E2-4    | <i>P{lacW}l(2)s3475</i> <sup>s3475</sup>     | <i>P{PZ}chn</i> <sup>02064</sup>           | CG8415 and <i>mRpS16</i> | <i>mRpS16</i> to <i>Df(2R)Jp1</i>                               |
| <i>Df(2R)BSC49</i> | 53D9-E1;54B5-10   | <i>P{EP}EP2344</i>                           | <i>P{EP}CG14478</i> <sup>EP2283</sup>      |                          | 53D to <i>Df(2R)BSC44</i>                                       |
| <i>Df(2R)BSC44</i> | 54B1-2;54B7-10    | <i>P{lacW}l(2)k04222b</i> <sup>k04222b</sup> | <i>P{EP}CG14478</i> <sup>EP2283</sup>      |                          | Part of <i>Df(2R)P803-delta15</i> to <i>Df(2R)robl-c</i><br>gap |
| <i>Df(2R)BSC45</i> | 54C8-D1;54E2-7    | <i>P{lacW}l(2)k07406</i> <sup>k07406</sup>   | <i>P{SUPor-P}CG6424</i> <sup>KG00595</sup> | CG4866 and <i>RpL18A</i> | <i>RpL18A</i> to <i>Df(2R)14H10Y-53</i>                         |
| <i>Df(2R)BSC26</i> | 56C4;56D6-10      | <i>P{lacW}cora</i> <sup>k08713</sup>         | <i>P{PZ}hts</i> <sup>01103</sup>           | <i>RpL11</i>             | <i>Df(2R)P34</i> to <i>RpL11</i>                                |
| <i>Df(2R)BSC22</i> | 56D7-E3;56F9-12   | <i>P{EP}betaTub56D</i> <sup>EP2640</sup>     | <i>P{PZ}mus209</i> <sup>02448</sup>        | <i>RpL11</i>             | <i>RpL11</i> to <i>Df(2R)017</i>                                |
| <i>Df(2R)BSC19</i> | 56F12-14;57A4     | <i>P{EP}EP951</i>                            | <i>P{lacW}l(2)s4831</i> <sup>s4831</sup>   |                          | <i>Df(2R)017</i> to <i>Df(2R)AA21</i>                           |
| <i>Df(3L)BSC23</i> | 62E8;63B5-6       | <i>P{lacW}dos</i> <sup>P115</sup>            | <i>P{lacW}Hsp83</i> <sup>i5C2</sup>        |                          | <i>Df(3L)R-G7</i> to <i>Df(3L)M21</i>                           |
| <i>Df(3L)BSC27</i> | 65D4-5;65E4-6     | <i>P{lacW}l(3)L4060</i> <sup>L4060</sup>     | <i>P{PZ}corn</i> <sup>04202</sup>          | CG8615 and <i>mRpL50</i> | <i>Df(3L)XD198</i> to CG8615                                    |
| <i>Df(3L)BSC33</i> | 65E10-F1;65F2-6   | <i>P{lacW}Cdc27</i> <sup>L7123</sup>         | <i>P{lacW}l(3)j1D5</i> <sup>i1D5</sup>     | CG8615 and <i>mRpL50</i> | <i>mRpL50</i> to <i>Df(3L)pbl-X1</i>                            |
| <i>Df(3L)BSC13</i> | 66B12-C1;66D2-4   | <i>P{lacW}Nmt</i> <sup>i1C7</sup>            | <i>P{EP}ergic53</i> <sup>EP3212</sup>      | <i>RpL14</i>             | <i>Df(3L)66C-G28</i> to <i>RpL14</i>                            |
| <i>Df(3L)BSC35</i> | 66F1-2;67B2-3     | <i>P{EP}smg</i> <sup>EP3556</sup>            | <i>P{lacW}l(3)j2B9</i> <sup>i2B9</sup>     |                          | <i>Df(3L)Scf-R6</i> to <i>Df(3L)AC1</i>                         |
| <i>Df(3L)BSC46</i> | 67C2-4;67C8-10    | <i>P{PZ}fry</i> <sup>02240</sup>             | <i>P{EP}EP771</i>                          |                          | <i>Df(3L)AC1</i> to <i>Df(3L)BSC14</i>                          |

|                    |                   |                                        |                                         |                                                   |                                                                 |
|--------------------|-------------------|----------------------------------------|-----------------------------------------|---------------------------------------------------|-----------------------------------------------------------------|
| <i>Df(3L)BSC14</i> | 67E3-7;68A2-6     | <i>P{PZ}Dhh1<sup>rLS62</sup></i>       | <i>P{lacW}l(3)01239<sup>j9B4</sup></i>  |                                                   | Part of <i>Df(3L)AC1</i> to <i>Df(3L)vin5</i> gap               |
| <i>Df(3L)BSC10</i> | 69D4-5;69F5-7     | <i>P{lacW}mirr<sup>rrc2</sup></i>      | <i>P{lacW}RpS12<sup>r2783</sup></i>     | <i>RpS12</i>                                      | <i>Df(3L)eyg<sup>Cl</sup></i> to <i>RpS12</i>                   |
| <i>Df(3L)BSC12</i> | 69F6-70A1;70A1-2  | <i>P{PZ}Syx13<sup>01470</sup></i>      | <i>P{EP}caps<sup>EP3557</sup></i>       | <i>RpS4</i> and <i>RpS12</i>                      | <i>RpS4</i> to <i>In(3LR)C190<sup>L</sup>Ubx<sup>42TR</sup></i> |
| <i>Df(3L)BSC8</i>  | 74D3-75A1;75B2-5  | <i>P{lacW}l(3)j11B2<sup>11B2</sup></i> | <i>P{PZ}Eip75B<sup>07041</sup></i>      |                                                   | <i>Df(3L)81k19</i> to <i>Df(3L)W10</i>                          |
| <i>Df(3L)BSC20</i> | 76A7-B1;76B4-5    | <i>P{PZ}l(3)00864<sup>00864</sup></i>  | <i>P{lacW}l(3)L3809<sup>L3809</sup></i> |                                                   | <i>Df(3L)jz2</i> to <i>Df(3L)kto2</i>                           |
| <i>Df(3L)BSC21</i> | 79E5-F1;80A2-3    | <i>P{PZ}Ten-m<sup>05309</sup></i>      | <i>P{PZ}nrm<sup>A37</sup></i>           | <i>Rp21</i>                                       | <i>Df(3L)HD1</i> to <i>Rp21</i>                                 |
| <i>Df(3R)BSC47</i> | 83B7-C1;83C6-D1   | <i>P{EP}CG31549<sup>EP3625</sup></i>   | <i>P{EP}CG2017<sup>EP3503</sup></i>     | <i>CG1475</i>                                     | <i>CG1475</i> to <i>Df(3R)Tpl10</i>                             |
| <i>Df(3R)BSC24</i> | 85C4-9;85D12-14   | <i>P{EP}EP3243</i>                     | <i>P{EP}EP0707<sup>EP707</sup></i>      |                                                   | <i>Df(3R)p-XT103</i> to <i>Df(3R)by10</i>                       |
| <i>Df(3R)BSC38</i> | 85F1-2;86C7-8     | <i>P{EP}EP3681</i>                     | <i>P{EP}EP3340<sup>EP3340</sup></i>     |                                                   | <i>Df(3R)by10</i> to <i>Df(3R)M-Kx1</i>                         |
| <i>Df(3R)BSC43</i> | 92F7-93A1;93B3-6  | <i>P{PZ}CG31195<sup>03806</sup></i>    | <i>P{lacW}Rab11<sup>12D1</sup></i>      | <i>RpS20</i> and <i>CG15697</i>                   | <i>CG15697</i> to <i>Df(3R)e-R1</i>                             |
| <i>Df(3R)BSC34</i> | 93F13-94A2;94D1-2 | <i>P{lacW}how<sup>j5B5</sup></i>       | <i>P{PZ}klg<sup>rN712</sup></i>         |                                                   |                                                                 |
| <i>Df(3R)BSC48</i> | 95A5-8;95B2-6     | <i>P{EP}EP3281</i>                     | <i>P{PZ}l(3)04684<sup>04684</sup></i>   | <i>RpS3</i>                                       | <i>RpS3</i> to <i>Df(3R)mbc-30</i>                              |
| <i>Df(3R)BSC42</i> | 98B1-2;98B3-5     | <i>P{PZ}btz<sup>rL203</sup></i>        | <i>P{EP}EP3088</i>                      | <i>CG12275</i> , <i>mRpS22</i><br>and <i>RpL1</i> | <i>CG12275</i> to <i>mRpS22</i>                                 |

<sup>1</sup>Descriptions of individual deletion screens are archived in FlyBase (<http://flybase.net/>)
