# Supplementary material for: Systematic generation of high-resolution deletion coverage of the Drosophila melanogaster genome
Source: Springer Nature journal article supplement (doi:10.1038/ng1312), 2004-02-22
Supplement: ng1312-S3.pdf [file ng1312-S3.pdf]

Supplementary Table 2. Deletions generated at Exelixis between FRT-bearing transposons

| EXEL Df_name          | w+/- | Left Tns      | Left coordinate | Right Tns     | Right coordinate | Left Cyto | Right Cyto | #bp deleted | # CG isoforms deleted |
|-----------------------|------|---------------|-----------------|---------------|------------------|-----------|------------|-------------|-----------------------|
| <i>Df(1)Exel6221</i>  | w+   | <i>d10304</i> | 228175          | <i>d01107</i> | 281105           | 1B4       | 1B8        | 52930       | 17                    |
| <i>Df(1)Exel6222</i>  | w+   | <i>d01107</i> | 281105          | <i>d00293</i> | 375775           | 1B8       | 1B12       | 94670       | 6                     |
| <i>Df(1)Exel6223</i>  | w+   | <i>d04596</i> | 527413          | <i>d03688</i> | 666681           | 1C4       | 1D2        | 139268      | 17                    |
| <i>Df(1)Exel6224</i>  | w+   | <i>d03688</i> | 666681          | <i>d03453</i> | 743472           | 1D2       | 1D4        | 76791       | 13                    |
| <i>Df(1)Exel6225</i>  | w+   | <i>d03453</i> | 743472          | <i>d05176</i> | 892238           | 1D4       | 1E3        | 148766      | 12                    |
| <i>Df(1)Exel6226</i>  | w+   | <i>d10916</i> | 891500          | <i>d11561</i> | 1079750          | 1E3       | 1F2        | 188250      | 25                    |
| <i>Df(1)Exel6227</i>  | w+   | <i>d11561</i> | 1079750         | <i>d03799</i> | 1236130          | 1F2       | 2B1        | 156380      | 43                    |
| <i>Df(1)Exel8196</i>  | w-   | <i>d03799</i> | 1236130         | <i>f06503</i> | 1425900          | 2B1       | 2B5        | 189770      | 20                    |
| <i>Df(1)Exel6289</i>  | w+   | <i>d08524</i> | 1807258         | <i>d08822</i> | 1951249          | 2C8       | 2E1        | 143991      | 43                    |
| <i>Df(1)Exel6229</i>  | w+   | <i>d10154</i> | 2052907         | <i>d07334</i> | 2144428          | 2F5       | 3A2        | 91521       | 10                    |
| <i>Df(1)Exel6230</i>  | w+   | <i>d02997</i> | 2144344         | <i>d01530</i> | 2302265          | 3A2       | 3A4        | 157921      | 14                    |
| <i>Df(1)Exel6231</i>  | w+   | <i>d07334</i> | 2144428         | <i>d07015</i> | 2226067          | 3A2       | 3A3        | 81639       | 8                     |
| <i>Df(1)Exel6232</i>  | w+   | <i>d01058</i> | 3053520         | <i>d10270</i> | 3131375          | 3C12      | 3D2        | 77855       | 15                    |
| <i>Df(1)Exel6233</i>  | w+   | <i>d10270</i> | 3131375         | <i>d02780</i> | 3244025          | 3D2       | 3D4        | 112650      | 14                    |
| <i>Df(1)Exel6290</i>  | w+   | <i>d03003</i> | 5105146         | <i>d09225</i> | 5169122          | 4F7       | 4F10       | 63976       | 14                    |
| <i>Df(1)Exel6234</i>  | w+   | <i>d09225</i> | 5169122         | <i>d00314</i> | 5257293          | 4F10      | 5A2        | 88171       | 6                     |
| <i>Df(1)Exel6235</i>  | w+   | <i>d00314</i> | 5257293         | <i>d07615</i> | 5334341          | 5A2       | 5A6        | 77048       | 4                     |
| <i>Df(1)Exel6236</i>  | w+   | <i>d05938</i> | 5420316         | <i>d11614</i> | 5510930          | 5A12      | 5C2        | 90614       | 23                    |
| <i>Df(1)Exel6237</i>  | w+   | <i>d11614</i> | 5510930         | <i>d04825</i> | 5633160          | 5C2       | 5C6        | 122230      | 18                    |
| <i>Df(1)Exel6238</i>  | w+   | <i>d00055</i> | 5809364         | <i>d11547</i> | 6009077          | 5D3       | 5E4        | 199713      | 24                    |
| <i>Df(1)Exel6239</i>  | w+   | <i>d04079</i> | 6084635         | <i>d02940</i> | 6264773          | 5F2       | 6B1        | 180138      | 10                    |
| <i>Df(1)Exel6240</i>  | w+   | <i>d01329</i> | 6284280         | <i>d09974</i> | 6410220          | 6B2       | 6C4        | 125940      | 17                    |
| <i>Df(1)Exel6241</i>  | w+   | <i>d06829</i> | 8448814         | <i>d08493</i> | 8545575          | 8A2       | 8B2        | 96761       | 6                     |
| <i>Df(1)Exel9049</i>  | w-   | <i>f06362</i> | 8986055         | <i>d03720</i> | 8991121          | 8D10      | 8D10       | 5066        | 4                     |
| <i>Df(1)Exel6242</i>  | w+   | <i>d01321</i> | 11356852        | <i>d03329</i> | 11450275         | 10D1      | 10D7       | 93423       | 17                    |
| <i>Df(1)Exel9050</i>  | w-   | <i>d00034</i> | 11429473        | <i>e02394</i> | 11441116         | 10D5      | 10D6       | 11643       | 5                     |
| <i>Df(1)Exel6243</i>  | w+   | <i>d01593</i> | 11535840        | <i>d01822</i> | 11737730         | 10E3      | 11A1       | 201890      | 36                    |
| <i>Df(1)Exel6244</i>  | w+   | <i>d05193</i> | 12194245        | <i>d02569</i> | 12278611         | 11A11     | 11B1       | 84366       | 8                     |
| <i>Df(1)Exel6245</i>  | w+   | <i>d03070</i> | 13050503        | <i>d03218</i> | 13142297         | 11E11     | 11F4       | 91794       | 28                    |
| <i>Df(1)Exel6246</i>  | w+   | <i>d03218</i> | 13142297        | <i>d01071</i> | 13372529         | 11F4      | 12A9       | 230232      | 25                    |
| <i>Df(1)Exel6247</i>  | w+   | <i>d03005</i> | 13372766        | <i>d01815</i> | 13514280         | 12A9      | 12C2       | 141514      | 27                    |
| <i>Df(1)Exel6248</i>  | w+   | <i>d06500</i> | 14556954        | <i>d02883</i> | 14654675         | 12F4      | 13A1       | 97721       | 24                    |
| <i>Df(1)Exel6249</i>  | w+   | <i>d01497</i> | 14754922        | <i>d08819</i> | 14894075         | 13A5      | 13B1       | 139153      | 23                    |
| <i>Df(1)Exel6250</i>  | w+   | <i>d09577</i> | 15364658        | <i>d08291</i> | 15535362         | 13E3      | 13F1       | 170704      | 43                    |
| <i>Df(1)Exel6251</i>  | w+   | <i>d08291</i> | 15535362        | <i>d08479</i> | 15598850         | 13F1      | 13F17      | 63488       | 16                    |
| <i>Df(1)Exel7463</i>  | w-   | <i>d09138</i> | 18264971        | <i>f06409</i> | 18472193         | 17C2      | 17D3       | 207222      | 19                    |
| <i>Df(1)Exel7464</i>  | w-   | <i>d07122</i> | 18423839        | <i>f01197</i> | 18561653         | 17D1      | 17E1       | 137814      | 21                    |
| <i>Df(1)Exel9051</i>  | w-   | <i>d07122</i> | 18423839        | <i>f06409</i> | 18472193         | 17D1      | 17D3       | 48354       | 3                     |
| <i>Df(1)Exel7465</i>  | w-   | <i>f06062</i> | 18531192        | <i>d06381</i> | 18629991         | 17D6      | 18A1       | 98799       | 18                    |
| <i>Df(1)Exel6291</i>  | w+   | <i>d06606</i> | 18759564        | <i>d02096</i> | 18884547         | 18A2      | 18A3       | 124983      | 10                    |
| <i>Df(1)Exel7468</i>  | w-   | <i>d05258</i> | 18995452        | <i>f07811</i> | 19240600         | 18B7      | 18C8       | 245148      | 30                    |
| <i>Df(1)Exel6253</i>  | w+   | <i>d06869</i> | 19393942        | <i>d06045</i> | 19519653         | 18D13     | 18F2       | 125711      | 31                    |
| <i>Df(1)Exel6254</i>  | w+   | <i>d02908</i> | 20003330        | <i>d08109</i> | 20141169         | 19C3      | 19D1       | 137839      | 26                    |
| <i>Df(1)Exel6255</i>  | w+   | <i>d03497</i> | 21191160        | <i>d01877</i> | 21450529         | 20A1      | 20B1       | 259369      | 39                    |
| <i>Df(2L)Exel6001</i> | w+   | <i>d05709</i> | 67202           | <i>d02344</i> | 129261           | 21A4      | 21B1       | 62059       | 23                    |
| <i>Df(2L)Exel7002</i> | w-   | <i>e03785</i> | 202685          | <i>d11630</i> | 285630           | 21B4      | 21B7       | 82945       | 21                    |
| <i>Df(2L)Exel8001</i> | w-   | <i>f07064</i> | 271714          | <i>d10144</i> | 307085           | 21B7      | 21B8       | 35371       | 15                    |

|                       |    |               |         |               |         |       |       |        |    |
|-----------------------|----|---------------|---------|---------------|---------|-------|-------|--------|----|
| <i>Df(2L)Exel8003</i> | w- | <i>e02928</i> | 560806  | <i>d03185</i> | 716744  | 21D1  | 21D2  | 155938 | 15 |
| <i>Df(2L)Exel6002</i> | w+ | <i>d03185</i> | 716744  | <i>d01062</i> | 827838  | 21D2  | 21D3  | 111094 | 22 |
| <i>Df(2L)Exel7005</i> | w- | <i>f04199</i> | 778546  | <i>d06435</i> | 870032  | 21D2  | 21D4  | 91486  | 27 |
| <i>Df(2L)Exel6003</i> | w+ | <i>d01062</i> | 827838  | <i>d01624</i> | 1075686 | 21D3  | 21E3  | 247848 | 32 |
| <i>Df(2L)Exel6004</i> | w+ | <i>d01624</i> | 1075686 | <i>d05685</i> | 1159844 | 21E3  | 21F2  | 84158  | 20 |
| <i>Df(2L)Exel9037</i> | w+ | <i>d01624</i> | 1075686 | <i>d11319</i> | 1120622 | 21E3  | 21F1  | 44936  | 11 |
| <i>Df(2L)Exel7006</i> | w- | <i>d00534</i> | 1159819 | <i>f07085</i> | 1312727 | 21F2  | 21F4  | 152908 | 25 |
| <i>Df(2L)Exel8004</i> | w- | <i>f06282</i> | 1291722 | <i>d05570</i> | 1556758 | 21F4  | 22A3  | 265036 | 31 |
| <i>Df(2L)Exel6005</i> | w+ | <i>d05570</i> | 1556758 | <i>d03246</i> | 1739118 | 22A3  | 22B1  | 182360 | 25 |
| <i>Df(2L)Exel7007</i> | w- | <i>e00411</i> | 1718599 | <i>d07754</i> | 1911684 | 22B1  | 22B5  | 193085 | 26 |
| <i>Df(2L)Exel8005</i> | w- | <i>d05701</i> | 1739349 | <i>f06646</i> | 2011783 | 22B2  | 22B8  | 272434 | 32 |
| <i>Df(2L)Exel6006</i> | w+ | <i>d01604</i> | 1913292 | <i>d00761</i> | 2168166 | 22B5  | 22D1  | 254874 | 39 |
| <i>Df(2L)Exel7008</i> | w- | <i>d04217</i> | 1990625 | <i>e04281</i> | 2144872 | 22B8  | 22D1  | 154247 | 25 |
| <i>Df(2L)Exel7009</i> | w- | <i>e03823</i> | 2129879 | <i>d03282</i> | 2234698 | 22D1  | 22D5  | 104819 | 31 |
| <i>Df(2L)Exel6007</i> | w+ | <i>d00761</i> | 2168166 | <i>d05960</i> | 2355401 | 22D1  | 22E1  | 187235 | 48 |
| <i>Df(2L)Exel7010</i> | w- | <i>f00030</i> | 2213374 | <i>d09675</i> | 2355369 | 22D4  | 22E1  | 141995 | 37 |
| <i>Df(2L)Exel7011</i> | w- | <i>d05960</i> | 2355401 | <i>f00170</i> | 2484933 | 22E1  | 22F3  | 129532 | 28 |
| <i>Df(2L)Exel6008</i> | w+ | <i>d03017</i> | 2487104 | <i>d03663</i> | 2747659 | 22F3  | 23A3  | 260555 | 38 |
| <i>Df(2L)Exel6277</i> | w+ | <i>d00111</i> | 2670203 | <i>d06097</i> | 2800536 | 23A2  | 23B1  | 130333 | 29 |
| <i>Df(2L)Exel8006</i> | w- | <i>d07788</i> | 2800540 | <i>f05164</i> | 2843256 | 23B1  | 23B5  | 42716  | 16 |
| <i>Df(2L)Exel7014</i> | w- | <i>e02085</i> | 2972189 | <i>d02216</i> | 3049262 | 23C4  | 23D1  | 77073  | 25 |
| <i>Df(2L)Exel7015</i> | w- | <i>d04154</i> | 3039141 | <i>f05661</i> | 3302819 | 23D1  | 23E3  | 263678 | 27 |
| <i>Df(2L)Exel8008</i> | w- | <i>e02627</i> | 3295212 | <i>d02260</i> | 3347399 | 23E3  | 23E5  | 52187  | 12 |
| <i>Df(2L)Exel7016</i> | w- | <i>d11646</i> | 3347387 | <i>f02186</i> | 3465873 | 23E5  | 23F5  | 118486 | 23 |
| <i>Df(2L)Exel7017</i> | w- | <i>d01451</i> | 3469761 | <i>e00955</i> | 3624435 | 23F6  | 24A2  | 154674 | 26 |
| <i>Df(2L)Exel7018</i> | w- | <i>f01314</i> | 3595211 | <i>d00982</i> | 3722743 | 24A1  | 24C2  | 127532 | 28 |
| <i>Df(2L)Exel6009</i> | w+ | <i>d04441</i> | 3763867 | <i>d05064</i> | 3881461 | 24C3  | 24C8  | 117594 | 21 |
| <i>Df(2L)Exel8010</i> | w- | <i>e04209</i> | 3880552 | <i>d06558</i> | 4023888 | 24C8  | 24D4  | 143336 | 9  |
| <i>Df(2L)Exel8011</i> | w- | <i>d09957</i> | 4190313 | <i>f06331</i> | 4589229 | 24D8  | 25A1  | 398916 | 51 |
| <i>Df(2L)Exel6010</i> | w+ | <i>d01652</i> | 4813287 | <i>d04725</i> | 4880329 | 25A7  | 25B1  | 67042  | 18 |
| <i>Df(2L)Exel8012</i> | w- | <i>e00436</i> | 4839509 | <i>d02169</i> | 4970151 | 25B1  | 25B8  | 130642 | 42 |
| <i>Df(2L)Exel9062</i> | w- | <i>e00436</i> | 4839509 | <i>d04725</i> | 4880329 | 25B1  | 25B1  | 40820  | 11 |
| <i>Df(2L)Exel7021</i> | w- | <i>d06474</i> | 4908106 | <i>e02571</i> | 4971793 | 25B3  | 25B9  | 63687  | 26 |
| <i>Df(2L)Exel8013</i> | w- | <i>e00901</i> | 4967966 | <i>d07427</i> | 4993508 | 25B8  | 25B10 | 25542  | 15 |
| <i>Df(2L)Exel7022</i> | w- | <i>d01421</i> | 4993410 | <i>f00386</i> | 5050854 | 25B10 | 25C3  | 57444  | 25 |
| <i>Df(2L)Exel6011</i> | w+ | <i>d02085</i> | 5139829 | <i>d01873</i> | 5298159 | 25C8  | 25D5  | 158330 | 22 |
| <i>Df(2L)Exel6012</i> | w+ | <i>d01873</i> | 5298159 | <i>d05326</i> | 5547174 | 25D5  | 25E6  | 249015 | 39 |
| <i>Df(2L)Exel7023</i> | w- | <i>d06812</i> | 5516391 | <i>f07682</i> | 5586297 | 25E5  | 25F1  | 69906  | 24 |
| <i>Df(2L)Exel8016</i> | w- | <i>d05326</i> | 5547174 | <i>f02063</i> | 5650931 | 25E6  | 25F2  | 103757 | 10 |
| <i>Df(2L)Exel6256</i> | w+ | <i>d05326</i> | 5547271 | <i>d06359</i> | 5650844 | 25E6  | 25F2  | 103573 | 10 |
| <i>Df(2L)Exel6013</i> | w+ | <i>d06359</i> | 5650844 | <i>d07408</i> | 5797546 | 25F2  | 25F5  | 146702 | 22 |
| <i>Df(2L)Exel6014</i> | w+ | <i>d07408</i> | 5797453 | <i>d02683</i> | 5936849 | 25F5  | 26A3  | 139396 | 18 |
| <i>Df(2L)Exel7024</i> | w- | <i>e00108</i> | 5890137 | <i>d11344</i> | 5972326 | 26A1  | 26A8  | 82189  | 23 |
| <i>Df(2L)Exel8017</i> | w- | <i>d06368</i> | 5972288 | <i>f06273</i> | 6092570 | 26A8  | 26B9  | 120282 | 46 |
| <i>Df(2L)Exel6015</i> | w+ | <i>d00043</i> | 6080453 | <i>d06531</i> | 6245153 | 26B9  | 26C1  | 164700 | 20 |
| <i>Df(2L)Exel6016</i> | w+ | <i>d01176</i> | 6245155 | <i>d02689</i> | 6403707 | 26C1  | 26D1  | 158552 | 22 |
| <i>Df(2L)Exel9038</i> | w+ | <i>d06926</i> | 6285110 | <i>d02317</i> | 6331064 | 26C2  | 26C3  | 45954  | 7  |
| <i>Df(2L)Exel7027</i> | w- | <i>e02023</i> | 6656916 | <i>d11210</i> | 6779082 | 26F5  | 27B1  | 122166 | 30 |
| <i>Df(2L)Exel7029</i> | w- | <i>d06312</i> | 6914375 | <i>f02686</i> | 7014732 | 27C4  | 27D4  | 100357 | 24 |
| <i>Df(2L)Exel7030</i> | w- | <i>d08277</i> | 7002126 | <i>f08077</i> | 7158092 | 27D3  | 27E3  | 155966 | 30 |
| <i>Df(2L)Exel8019</i> | w- | <i>f04177</i> | 7132386 | <i>d00262</i> | 7194542 | 27E2  | 27E4  | 62156  | 6  |

|                       |    |               |          |               |          |       |       |        |    |
|-----------------------|----|---------------|----------|---------------|----------|-------|-------|--------|----|
| <i>Df(2L)Exel6017</i> | w+ | <i>d00262</i> | 7194542  | <i>d05849</i> | 7410214  | 27E4  | 27F5  | 215672 | 27 |
| <i>Df(2L)Exel7031</i> | w- | <i>f05146</i> | 7357082  | <i>d09502</i> | 7487722  | 27F3  | 28A1  | 130640 | 27 |
| <i>Df(2L)Exel6018</i> | w+ | <i>d02049</i> | 7568596  | <i>d03976</i> | 7695072  | 28B1  | 28C1  | 126476 | 20 |
| <i>Df(2L)Exel9031</i> | w+ | <i>f00390</i> | 7629980  | <i>e04189</i> | 7652622  | 28B4  | 28C1  | 22642  | 4  |
| <i>Df(2L)Exel7032</i> | w- | <i>e02187</i> | 7781317  | <i>d05214</i> | 7879787  | 28C4  | 28D2  | 98470  | 20 |
| <i>Df(2L)Exel8056</i> | w- | <i>d09955</i> | 7807732  | <i>f02736</i> | 7958786  | 28C4  | 28D3  | 151054 | 18 |
| <i>Df(2L)Exel7034</i> | w- | <i>e00753</i> | 8063431  | <i>d02071</i> | 8197391  | 28E1  | 28F1  | 133960 | 33 |
| <i>Df(2L)Exel8021</i> | w- | <i>f01450</i> | 8395134  | <i>d09177</i> | 8456019  | 29C1  | 29D1  | 60885  | 19 |
| <i>Df(2L)Exel7038</i> | w- | <i>e00421</i> | 8429839  | <i>d09381</i> | 8520753  | 29C4  | 29D4  | 90914  | 24 |
| <i>Df(2L)Exel7039</i> | w- | <i>d03596</i> | 8521356  | <i>f05176</i> | 8794191  | 29D5  | 29F1  | 272835 | 22 |
| <i>Df(2L)Exel7040</i> | w- | <i>f07037</i> | 8790231  | <i>d00885</i> | 8977160  | 29F1  | 29F6  | 186929 | 26 |
| <i>Df(2L)Exel6021</i> | w+ | <i>d04273</i> | 8981539  | <i>d05178</i> | 9168395  | 29F7  | 30A2  | 186856 | 21 |
| <i>Df(2L)Exel8022</i> | w- | <i>d00155</i> | 9380365  | <i>e04277</i> | 9440787  | 30B3  | 30B5  | 60422  | 8  |
| <i>Df(2L)Exel7042</i> | w- | <i>d02198</i> | 9515089  | <i>f04566</i> | 9614757  | 30B10 | 30C1  | 99668  | 23 |
| <i>Df(2L)Exel6024</i> | w+ | <i>d00706</i> | 9605833  | <i>d04599</i> | 9774436  | 30C1  | 30C9  | 168603 | 26 |
| <i>Df(2L)Exel9040</i> | w- | <i>d02943</i> | 9605894  | <i>f04566</i> | 9614757  | 30C1  | 30C1  | 8863   | 4  |
| <i>Df(2L)Exel6025</i> | w+ | <i>d04599</i> | 9774436  | <i>d05318</i> | 9889672  | 30C9  | 30E1  | 115236 | 14 |
| <i>Df(2L)Exel7043</i> | w- | <i>d00596</i> | 9852246  | <i>e02074</i> | 9932584  | 30D1  | 30F1  | 80338  | 25 |
| <i>Df(2L)Exel6026</i> | w+ | <i>d07004</i> | 10049339 | <i>d03886</i> | 10314062 | 31A2  | 31D7  | 264723 | 80 |
| <i>Df(2L)Exel8024</i> | w- | <i>d07004</i> | 10049339 | <i>f06306</i> | 10232209 | 31A2  | 31B1  | 182870 | 37 |
| <i>Df(2L)Exel9032</i> | w+ | <i>f01571</i> | 10126595 | <i>e00744</i> | 10191401 | 31A3  | 31B1  | 64806  | 6  |
| <i>Df(2L)Exel7046</i> | w- | <i>f01321</i> | 10269280 | <i>d05337</i> | 10326107 | 31C3  | 31D9  | 56827  | 26 |
| <i>Df(2L)Exel7048</i> | w- | <i>e01078</i> | 10435619 | <i>d03619</i> | 10537262 | 31E3  | 31F5  | 101643 | 22 |
| <i>Df(2L)Exel8026</i> | w- | <i>d01635</i> | 10508899 | <i>e00677</i> | 10854301 | 31F5  | 32B1  | 345402 | 63 |
| <i>Df(2L)Exel7049</i> | w- | <i>e02595</i> | 10845803 | <i>d01007</i> | 10967695 | 32B1  | 32C1  | 121892 | 20 |
| <i>Df(2L)Exel6027</i> | w+ | <i>d03756</i> | 11059392 | <i>d02527</i> | 11148234 | 32D2  | 32D5  | 88842  | 22 |
| <i>Df(2L)Exel6028</i> | w+ | <i>d02527</i> | 11148234 | <i>d00753</i> | 11347437 | 32D5  | 32E4  | 199203 | 18 |
| <i>Df(2L)Exel6029</i> | w+ | <i>d00753</i> | 11347437 | <i>d00720</i> | 11434536 | 32E4  | 32F2  | 87099  | 3  |
| <i>Df(2L)Exel6030</i> | w+ | <i>d06178</i> | 11796381 | <i>d11310</i> | 11959952 | 33A2  | 33B3  | 163571 | 22 |
| <i>Df(2L)Exel6031</i> | w+ | <i>d11310</i> | 11959952 | <i>d06386</i> | 12055640 | 33B3  | 33C2  | 95688  | 32 |
| <i>Df(2L)Exel6032</i> | w+ | <i>d06386</i> | 12055640 | <i>d10582</i> | 12259676 | 33C2  | 33D4  | 204036 | 32 |
| <i>Df(2L)Exel6033</i> | w+ | <i>d02330</i> | 12412264 | <i>d04855</i> | 12644664 | 33E4  | 33F2  | 232400 | 23 |
| <i>Df(2L)Exel6034</i> | w+ | <i>d04855</i> | 12644664 | <i>d01393</i> | 12843600 | 33F2  | 34A1  | 198936 | 21 |
| <i>Df(2L)Exel8028</i> | w- | <i>d05987</i> | 12821657 | <i>f03643</i> | 12885037 | 34A1  | 34A2  | 63380  | 0  |
| <i>Df(2L)Exel7055</i> | w- | <i>f07559</i> | 12861465 | <i>d00089</i> | 13154806 | 34A2  | 34A7  | 293341 | 26 |
| <i>Df(2L)Exel8029</i> | w- | <i>e03825</i> | 13144117 | <i>d06788</i> | 13244300 | 34A6  | 34B2  | 100183 | 32 |
| <i>Df(2L)Exel9023</i> | w- | <i>e03825</i> | 13144117 | <i>d00089</i> | 13154806 | 34A6  | 34A7  | 10689  | 5  |
| <i>Df(2L)Exel7058</i> | w- | <i>f04246</i> | 13467456 | <i>d06718</i> | 13762369 | 34C2  | 34D1  | 294913 | 23 |
| <i>Df(2L)Exel7059</i> | w- | <i>e00018</i> | 13782899 | <i>d09343</i> | 13860179 | 34D3  | 34E1  | 77280  | 21 |
| <i>Df(2L)Exel8032</i> | w- | <i>d09065</i> | 13995762 | <i>e02629</i> | 14285145 | 34F1  | 35A3  | 289383 | 21 |
| <i>Df(2L)Exel6035</i> | w+ | <i>d10717</i> | 14283118 | <i>d00984</i> | 14452393 | 35A3  | 35B2  | 169275 | 23 |
| <i>Df(2L)Exel6036</i> | w+ | <i>d00615</i> | 14391530 | <i>d07564</i> | 14472684 | 35B1  | 35B2  | 81154  | 3  |
| <i>Df(2L)Exel8033</i> | w- | <i>f04535</i> | 14437873 | <i>d08882</i> | 14975626 | 35B1  | 35B8  | 537753 | 36 |
| <i>Df(2L)Exel7061</i> | w- | <i>f04303</i> | 14865637 | <i>d09328</i> | 15052548 | 35B7  | 35C1  | 186911 | 27 |
| <i>Df(2L)Exel7062</i> | w- | <i>d01358</i> | 15034799 | <i>f04352</i> | 15304290 | 35B9  | 35D1  | 269491 | 34 |
| <i>Df(2L)Exel8034</i> | w- | <i>d04617</i> | 15242781 | <i>f03219</i> | 15417938 | 35C5  | 35D2  | 175157 | 18 |
| <i>Df(2L)Exel7063</i> | w- | <i>d04022</i> | 15404103 | <i>e04211</i> | 15722612 | 35D2  | 35D4  | 318509 | 29 |
| <i>Df(2L)Exel6037</i> | w+ | <i>d01069</i> | 15740852 | <i>d01089</i> | 15890421 | 35D4  | 35D6  | 149569 | 17 |
| <i>Df(2L)Exel6038</i> | w+ | <i>d01089</i> | 15890421 | <i>d03602</i> | 16020711 | 35D6  | 35E2  | 130290 | 14 |
| <i>Df(2L)Exel7065</i> | w- | <i>e01569</i> | 16285065 | <i>d07749</i> | 16498466 | 35F8  | 36A3  | 213401 | 36 |
| <i>Df(2L)Exel7066</i> | w- | <i>f02073</i> | 16435225 | <i>d03439</i> | 16705648 | 36A1  | 36A12 | 270423 | 33 |

|                       |    |               |          |               |          |       |       |        |    |
|-----------------------|----|---------------|----------|---------------|----------|-------|-------|--------|----|
| <i>Df(2L)Exel6039</i> | w+ | <i>d08214</i> | 16663295 | <i>d02851</i> | 16864499 | 36A10 | 36B3  | 201204 | 58 |
| <i>Df(2L)Exel7067</i> | w- | <i>e04667</i> | 16706371 | <i>d09893</i> | 16802986 | 36A12 | 36B2  | 96615  | 37 |
| <i>Df(2L)Exel8036</i> | w- | <i>d03254</i> | 16769517 | <i>e04169</i> | 17428340 | 36B1  | 36C9  | 658823 | 61 |
| <i>Df(2L)Exel7068</i> | w- | <i>d04045</i> | 17361071 | <i>e03015</i> | 17474074 | 36C7  | 36C10 | 113003 | 28 |
| <i>Df(2L)Exel7069</i> | w- | <i>e02094</i> | 17459926 | <i>d01122</i> | 17751609 | 36C10 | 36D1  | 291683 | 24 |
| <i>Df(2L)Exel9044</i> | w+ | <i>f02258</i> | 17480540 | <i>f02167</i> | 17582705 | 36C10 | 36C11 | 102165 | 8  |
| <i>Df(2L)Exel7070</i> | w- | <i>d10879</i> | 17881171 | <i>f03296</i> | 18157722 | 36D2  | 36E1  | 276551 | 31 |
| <i>Df(2L)Exel8038</i> | w- | <i>e00795</i> | 18101752 | <i>d10098</i> | 18433576 | 36D3  | 36E3  | 331824 | 31 |
| <i>Df(2L)Exel9033</i> | w+ | <i>f04763</i> | 18272815 | <i>f06810</i> | 18277277 | 36E1  | 36E1  | 4462   | 1  |
| <i>Df(2L)Exel6040</i> | w+ | <i>d02469</i> | 18423155 | <i>d06472</i> | 18549769 | 36E3  | 36F5  | 126614 | 11 |
| <i>Df(2L)Exel6041</i> | w+ | <i>d06472</i> | 18549769 | <i>d07144</i> | 18710518 | 36F5  | 37A2  | 160749 | 29 |
| <i>Df(2L)Exel7071</i> | w- | <i>e04701</i> | 18666921 | <i>d02636</i> | 18773903 | 37A1  | 37A4  | 106982 | 16 |
| <i>Df(2L)Exel7072</i> | w- | <i>d10289</i> | 18731327 | <i>f04364</i> | 18921609 | 37A2  | 37B6  | 190282 | 24 |
| <i>Df(2L)Exel7073</i> | w- | <i>f04195</i> | 18837135 | <i>d05541</i> | 19000178 | 37B1  | 37B9  | 163043 | 24 |
| <i>Df(2L)Exel6042</i> | w+ | <i>d06107</i> | 18952025 | <i>d08172</i> | 19139811 | 37B8  | 37C5  | 187786 | 51 |
| <i>Df(2L)Exel8039</i> | w- | <i>d00783</i> | 18973753 | <i>f05160</i> | 19022531 | 37B8  | 37B11 | 48778  | 13 |
| <i>Df(2L)Exel8040</i> | w- | <i>f06641</i> | 19088032 | <i>d07441</i> | 19139785 | 37C1  | 37C5  | 51753  | 15 |
| <i>Df(2L)Exel6043</i> | w+ | <i>d08172</i> | 19139811 | <i>d06639</i> | 19401592 | 37C5  | 37D7  | 261781 | 35 |
| <i>Df(2L)Exel7075</i> | w- | <i>e01067</i> | 19298632 | <i>d05357</i> | 19430995 | 37D2  | 37E1  | 132363 | 32 |
| <i>Df(2L)Exel8041</i> | w- | <i>d02245</i> | 19404550 | <i>e00523</i> | 19564348 | 37D7  | 37F2  | 159798 | 56 |
| <i>Df(2L)Exel7076</i> | w- | <i>e02285</i> | 19415971 | <i>d10551</i> | 19495694 | 37E1  | 37E5  | 79723  | 24 |
| <i>Df(2L)Exel6044</i> | w+ | <i>d03659</i> | 19554016 | <i>d00226</i> | 19742811 | 37F2  | 38A4  | 188795 | 18 |
| <i>Df(2L)Exel6045</i> | w+ | <i>d00226</i> | 19742811 | <i>d09251</i> | 19913174 | 38A4  | 38A7  | 170363 | 13 |
| <i>Df(2L)Exel7077</i> | w- | <i>d07725</i> | 19896008 | <i>e02081</i> | 20050543 | 38A7  | 38B2  | 154535 | 22 |
| <i>Df(2L)Exel6046</i> | w+ | <i>d06193</i> | 20174828 | <i>d03401</i> | 20418799 | 38C2  | 38C7  | 243971 | 22 |
| <i>Df(2L)Exel7078</i> | w- | <i>d03401</i> | 20427920 | <i>f04787</i> | 20650365 | 38C7  | 38D4  | 222445 | 23 |
| <i>Df(2L)Exel7079</i> | w- | <i>d05916</i> | 20739926 | <i>f07070</i> | 20844522 | 38E6  | 38F3  | 104596 | 33 |
| <i>Df(2L)Exel7080</i> | w- | <i>e03776</i> | 20831284 | <i>d00169</i> | 21072379 | 38F3  | 39A2  | 241095 | 22 |
| <i>Df(2L)Exel6047</i> | w+ | <i>d00169</i> | 21072379 | <i>d10907</i> | 21213857 | 39A2  | 39B4  | 141478 | 36 |
| <i>Df(2L)Exel9027</i> | w+ | <i>e02608</i> | 21136326 | <i>f03283</i> | 21175095 | 39A7  | 39B2  | 38769  | 12 |
| <i>Df(2L)Exel6048</i> | w+ | <i>d06230</i> | 21206959 | <i>d07954</i> | 21279263 | 39B4  | 39D1  | 72304  | 16 |
| <i>Df(2L)Exel7081</i> | w- | <i>d07954</i> | 21279263 | <i>f02046</i> | 21496059 | 39D1  | 39E6  | 216796 | 31 |
| <i>Df(2L)Exel7082</i> | w- | <i>f00125</i> | 21449653 | <i>d04701</i> | 21732645 | 39E3  | 40B3  | 282992 | 26 |
| <i>Df(2L)Exel6049</i> | w+ | <i>d00773</i> | 21661341 | <i>d02671</i> | 21852372 | 40A5  | 40D3  | 191031 | 8  |
| <i>Df(2R)Exel9021</i> | w- | <i>d01835</i> | 260267   | <i>e00162</i> | 427214   | 41E6  | 41F2  | 166947 | 10 |
| <i>Df(2R)Exel7085</i> | w- | <i>f05479</i> | 1098346  | <i>d03255</i> | 1272324  | 42A1  | 42A11 | 173978 | 33 |
| <i>Df(2R)Exel6050</i> | w+ | <i>d04690</i> | 1801635  | <i>d08724</i> | 1933545  | 42C7  | 42D4  | 131910 | 22 |
| <i>Df(2R)Exel6051</i> | w+ | <i>d08724</i> | 1933545  | <i>d05810</i> | 2053906  | 42D4  | 42E4  | 120361 | 22 |
| <i>Df(2R)Exel6283</i> | w+ | <i>d01125</i> | 2100923  | <i>d03458</i> | 2207951  | 42E7  | 43A1  | 107028 | 17 |
| <i>Df(2R)Exel6052</i> | w+ | <i>d00343</i> | 2554052  | <i>d01795</i> | 2683984  | 43D1  | 43E5  | 129932 | 29 |
| <i>Df(2R)Exel6053</i> | w+ | <i>d07159</i> | 2594437  | <i>d05699</i> | 2726586  | 43D5  | 43E9  | 132149 | 28 |
| <i>Df(2R)Exel7092</i> | w- | <i>d11611</i> | 2683336  | <i>e00150</i> | 2769608  | 43E5  | 43E12 | 86272  | 24 |
| <i>Df(2R)Exel6054</i> | w+ | <i>d05699</i> | 2726586  | <i>d00611</i> | 2873367  | 43E9  | 43E18 | 146781 | 32 |
| <i>Df(2R)Exel6055</i> | w+ | <i>d00150</i> | 2946879  | <i>d03158</i> | 3121795  | 43F1  | 44A4  | 174916 | 46 |
| <i>Df(2R)Exel6056</i> | w+ | <i>d03158</i> | 3121795  | <i>d00278</i> | 3293140  | 44A4  | 44C2  | 171345 | 42 |
| <i>Df(2R)Exel7094</i> | w- | <i>d03158</i> | 3121795  | <i>e02513</i> | 3192377  | 44A4  | 44B4  | 70582  | 23 |
| <i>Df(2R)Exel7095</i> | w- | <i>e02135</i> | 3185211  | <i>d10247</i> | 3293049  | 44B3  | 44C2  | 107838 | 26 |
| <i>Df(2R)Exel9022</i> | w- | <i>d11498</i> | 3213031  | <i>e01825</i> | 3225397  | 44B7  | 44B9  | 12366  | 7  |
| <i>Df(2R)Exel6057</i> | w+ | <i>d03443</i> | 3235392  | <i>d05853</i> | 3388275  | 44B9  | 44C4  | 152883 | 15 |
| <i>Df(2R)Exel6058</i> | w+ | <i>d05853</i> | 3388275  | <i>d01428</i> | 3505485  | 44C4  | 44D1  | 117210 | 21 |
| <i>Df(2R)Exel7096</i> | w- | <i>f02479</i> | 3494255  | <i>d03272</i> | 3633514  | 44C6  | 44D3  | 139259 | 21 |

|                       |    |               |          |               |          |       |       |        |    |
|-----------------------|----|---------------|----------|---------------|----------|-------|-------|--------|----|
| <i>Df(2R)Exel8047</i> | w- | <i>e03754</i> | 3660872  | <i>d10150</i> | 3710230  | 44D4  | 44D5  | 49358  | 7  |
| <i>Df(2R)Exel7098</i> | w- | <i>d09075</i> | 3710198  | <i>e00058</i> | 3794365  | 44D5  | 44E3  | 84167  | 26 |
| <i>Df(2R)Exel8048</i> | w- | <i>d03830</i> | 3952106  | <i>e03755</i> | 4087629  | 44F3  | 45A1  | 135523 | 43 |
| <i>Df(2R)Exel8049</i> | w- | <i>e03805</i> | 4611718  | <i>d04774</i> | 4718958  | 45F1  | 46A1  | 107240 | 30 |
| <i>Df(2R)Exel9016</i> | w- | <i>d10267</i> | 4773216  | <i>f01512</i> | 4780884  | 46B1  | 46B2  | 7668   | 4  |
| <i>Df(2R)Exel7112</i> | w- | <i>f04863</i> | 5847841  | <i>d06129</i> | 5939387  | 47B13 | 47C3  | 91546  | 22 |
| <i>Df(2R)Exel6059</i> | w+ | <i>d06273</i> | 5938877  | <i>d05704</i> | 6250576  | 47C3  | 47D6  | 311699 | 32 |
| <i>Df(2R)Exel6060</i> | w+ | <i>d05704</i> | 6250576  | <i>d01243</i> | 6462528  | 47D6  | 47F8  | 211952 | 83 |
| <i>Df(2R)Exel6061</i> | w+ | <i>d01888</i> | 7326166  | <i>d02413</i> | 7502159  | 48F5  | 49A6  | 175993 | 60 |
| <i>Df(2R)Exel7121</i> | w- | <i>e01840</i> | 7635400  | <i>d05556</i> | 7744221  | 49B5  | 49C1  | 108821 | 43 |
| <i>Df(2R)Exel7123</i> | w- | <i>f00403</i> | 7926592  | <i>d09185</i> | 8045835  | 49D5  | 49E6  | 119243 | 30 |
| <i>Df(2R)Exel6062</i> | w+ | <i>d09185</i> | 8045835  | <i>d02103</i> | 8099900  | 49E6  | 49F1  | 54065  | 1  |
| <i>Df(2R)Exel8057</i> | w- | <i>f00837</i> | 8099472  | <i>d03170</i> | 8284036  | 49F1  | 49F10 | 184564 | 32 |
| <i>Df(2R)Exel7124</i> | w- | <i>d05649</i> | 8283844  | <i>f05546</i> | 8345963  | 49F10 | 50A1  | 62119  | 25 |
| <i>Df(2R)Exel7128</i> | w- | <i>f04140</i> | 8866562  | <i>d06960</i> | 8962535  | 50C5  | 50C9  | 95973  | 28 |
| <i>Df(2R)Exel7129</i> | w- | <i>d11726</i> | 8948105  | <i>e04024</i> | 9182964  | 50C9  | 50D7  | 234859 | 34 |
| <i>Df(2R)Exel7130</i> | w- | <i>f00163</i> | 9137799  | <i>d01851</i> | 9276327  | 50D4  | 50E4  | 138528 | 25 |
| <i>Df(2R)Exel7131</i> | w- | <i>f03594</i> | 9294362  | <i>d10376</i> | 9423952  | 50E4  | 50F6  | 129590 | 25 |
| <i>Df(2R)Exel8059</i> | w- | <i>f07643</i> | 9566945  | <i>d02754</i> | 9639309  | 51A4  | 51B1  | 72364  | 7  |
| <i>Df(2R)Exel6284</i> | w+ | <i>d04234</i> | 9638476  | <i>d01831</i> | 9829316  | 51B1  | 51C2  | 190840 | 42 |
| <i>Df(2R)Exel7133</i> | w- | <i>d04234</i> | 9638477  | <i>f04337</i> | 9766292  | 51B1  | 51C1  | 127815 | 27 |
| <i>Df(2R)Exel7135</i> | w- | <i>d01547</i> | 10193481 | <i>f04840</i> | 10326477 | 51E2  | 51E11 | 132996 | 22 |
| <i>Df(2R)Exel9015</i> | w- | <i>d00545</i> | 10438901 | <i>f06594</i> | 10450049 | 51F11 | 51F12 | 11148  | 4  |
| <i>Df(2R)Exel9026</i> | w+ | <i>e02554</i> | 10631930 | <i>f02780</i> | 10639142 | 52A13 | 52A13 | 7212   | 5  |
| <i>Df(2R)Exel7137</i> | w- | <i>f06599</i> | 10658111 | <i>d07121</i> | 10922973 | 52B1  | 52C8  | 264862 | 34 |
| <i>Df(2R)Exel7138</i> | w- | <i>f00089</i> | 10982384 | <i>d07113</i> | 11071452 | 52D1  | 52D12 | 89068  | 28 |
| <i>Df(2R)Exel7139</i> | w- | <i>e04264</i> | 11062075 | <i>d11430</i> | 11174983 | 52D11 | 52E4  | 112908 | 29 |
| <i>Df(2R)Exel9060</i> | w+ | <i>e01566</i> | 11206392 | <i>f04518</i> | 11222289 | 52E9  | 52F1  | 15897  | 6  |
| <i>Df(2R)Exel6063</i> | w+ | <i>d03864</i> | 11251606 | <i>d05433</i> | 11450234 | 52F6  | 53C3  | 198628 | 60 |
| <i>Df(2R)Exel7142</i> | w- | <i>d06708</i> | 11352980 | <i>f02042</i> | 11488939 | 53A4  | 53C4  | 135959 | 37 |
| <i>Df(2R)Exel7144</i> | w- | <i>e01611</i> | 11635219 | <i>d07325</i> | 11754793 | 53C8  | 53C11 | 119574 | 20 |
| <i>Df(2R)Exel6064</i> | w+ | <i>d03892</i> | 11675359 | <i>d02394</i> | 11892799 | 53C10 | 53D2  | 217440 | 31 |
| <i>Df(2R)Exel7145</i> | w- | <i>d08377</i> | 11795139 | <i>f02489</i> | 11909992 | 53C13 | 53D14 | 114853 | 21 |
| <i>Df(2R)Exel6065</i> | w+ | <i>d07106</i> | 11920844 | <i>d07507</i> | 12161294 | 53D14 | 53F9  | 240450 | 61 |
| <i>Df(2R)Exel6066</i> | w+ | <i>d07507</i> | 12161294 | <i>d07438</i> | 12458367 | 53F9  | 54B6  | 297073 | 26 |
| <i>Df(2R)Exel7147</i> | w- | <i>e02656</i> | 12329699 | <i>d01052</i> | 12515802 | 54B1  | 54B16 | 186103 | 24 |
| <i>Df(2R)Exel7149</i> | w- | <i>f06544</i> | 12645006 | <i>d09752</i> | 12755512 | 54C10 | 54D5  | 110506 | 22 |
| <i>Df(2R)Exel7150</i> | w- | <i>d09044</i> | 12779996 | <i>f02255</i> | 12845365 | 54E1  | 54E9  | 65369  | 24 |
| <i>Df(2R)Exel7152</i> | w- | <i>f02247</i> | 13104090 | <i>d11608</i> | 13294351 | 55B1  | 55C1  | 190261 | 49 |
| <i>Df(2R)Exel7153</i> | w- | <i>f07719</i> | 13214952 | <i>d11608</i> | 13294351 | 55B9  | 55C1  | 79399  | 22 |
| <i>Df(2R)Exel7157</i> | w- | <i>d06996</i> | 13685221 | <i>e00779</i> | 13794416 | 55E2  | 55E11 | 109195 | 26 |
| <i>Df(2R)Exel7158</i> | w- | <i>f03280</i> | 13769251 | <i>d04157</i> | 13893441 | 55E9  | 55F6  | 124190 | 28 |
| <i>Df(2R)Exel6067</i> | w+ | <i>d01619</i> | 13921739 | <i>d01154</i> | 14011006 | 55F8  | 56A1  | 89267  | 6  |
| <i>Df(2R)Exel6068</i> | w+ | <i>d01154</i> | 14011006 | <i>d07413</i> | 14205610 | 56A1  | 56B5  | 194604 | 31 |
| <i>Df(2R)Exel6069</i> | w+ | <i>d07413</i> | 14205610 | <i>d04362</i> | 14389216 | 56B5  | 56C11 | 183606 | 30 |
| <i>Df(2R)Exel7162</i> | w- | <i>f04894</i> | 15309135 | <i>d11451</i> | 15377341 | 56F11 | 56F16 | 68206  | 24 |
| <i>Df(2R)Exel7163</i> | w- | <i>d09061</i> | 15487656 | <i>e03067</i> | 15646457 | 57A2  | 57A6  | 158801 | 23 |
| <i>Df(2R)Exel7164</i> | w- | <i>d02840</i> | 15645558 | <i>e03018</i> | 15730334 | 57A6  | 57A9  | 84776  | 25 |
| <i>Df(2R)Exel6070</i> | w+ | <i>d03069</i> | 15646492 | <i>d00869</i> | 15879546 | 57A6  | 57B3  | 233054 | 37 |
| <i>Df(2R)Exel6071</i> | w+ | <i>d00869</i> | 15879546 | <i>d01606</i> | 16100249 | 57B3  | 57B16 | 220703 | 33 |
| <i>Df(2R)Exel7166</i> | w- | <i>f04870</i> | 15914383 | <i>d05245</i> | 16043701 | 57B3  | 57B7  | 129318 | 19 |

|                       |    |               |          |               |          |       |       |        |    |
|-----------------------|----|---------------|----------|---------------|----------|-------|-------|--------|----|
| <i>Df(2R)Exel6072</i> | w+ | <i>d01606</i> | 16100249 | <i>d06425</i> | 16294512 | 57B16 | 57D4  | 194263 | 50 |
| <i>Df(2R)Exel7167</i> | w- | <i>f01506</i> | 16117282 | <i>d05287</i> | 16212737 | 57B16 | 57C7  | 95455  | 26 |
| <i>Df(2R)Exel6073</i> | w+ | <i>d00379</i> | 16120308 | <i>d05684</i> | 16222507 | 57B16 | 57C7  | 102199 | 31 |
| <i>Df(2R)Exel6074</i> | w+ | <i>d05684</i> | 16222507 | <i>d00526</i> | 16422964 | 57C7  | 57D13 | 200457 | 43 |
| <i>Df(2R)Exel6075</i> | w+ | <i>d06425</i> | 16294512 | <i>d00526</i> | 16422964 | 57D4  | 57D13 | 128452 | 32 |
| <i>Df(2R)Exel6076</i> | w+ | <i>d00526</i> | 16422984 | <i>d00587</i> | 16650632 | 57D13 | 57F3  | 227648 | 31 |
| <i>Df(2R)Exel6077</i> | w+ | <i>d06607</i> | 16757519 | <i>d07171</i> | 16915476 | 57F10 | 58A3  | 157957 | 22 |
| <i>Df(2R)Exel7169</i> | w- | <i>f05118</i> | 16905748 | <i>d08692</i> | 17083093 | 58A3  | 58B1  | 177345 | 22 |
| <i>Df(2R)Exel6078</i> | w+ | <i>d01936</i> | 17083091 | <i>d01712</i> | 17241194 | 58B1  | 58D1  | 158103 | 49 |
| <i>Df(2R)Exel7170</i> | w- | <i>d03467</i> | 17083182 | <i>e00062</i> | 17179477 | 58B1  | 58C1  | 96295  | 32 |
| <i>Df(2R)Exel7171</i> | w- | <i>f04755</i> | 17179512 | <i>d05100</i> | 17286795 | 58C1  | 58D2  | 107283 | 23 |
| <i>Df(2R)Exel7173</i> | w- | <i>f02069</i> | 17423748 | <i>d03821</i> | 17557545 | 58D4  | 58E5  | 133797 | 22 |
| <i>Df(2R)Exel7174</i> | w- | <i>d01959</i> | 17558162 | <i>e02938</i> | 17687294 | 58E5  | 58F3  | 129132 | 20 |
| <i>Df(2R)Exel6079</i> | w+ | <i>d07245</i> | 17772917 | <i>d03340</i> | 17841872 | 59A3  | 59B1  | 68955  | 9  |
| <i>Df(2R)Exel7176</i> | w- | <i>d04948</i> | 17932266 | <i>f07528</i> | 18079326 | 59B4  | 59C2  | 147060 | 26 |
| <i>Df(2R)Exel7177</i> | w- | <i>e00736</i> | 18112041 | <i>d00467</i> | 18247453 | 59C3  | 59D2  | 135412 | 25 |
| <i>Df(2R)Exel7178</i> | w- | <i>f07501</i> | 18335058 | <i>d07361</i> | 18439436 | 59D5  | 59D10 | 104378 | 32 |
| <i>Df(2R)Exel7179</i> | w- | <i>e00049</i> | 18473218 | <i>d09650</i> | 18591767 | 59D11 | 59E3  | 118549 | 23 |
| <i>Df(2R)Exel7180</i> | w- | <i>d11316</i> | 18587645 | <i>f00168</i> | 18729916 | 59E3  | 59F6  | 142271 | 36 |
| <i>Df(2R)Exel6080</i> | w+ | <i>d01459</i> | 18916138 | <i>d05545</i> | 19090372 | 60A6  | 60B5  | 174234 | 78 |
| <i>Df(2R)Exel7182</i> | w- | <i>f02243</i> | 18993017 | <i>d11424</i> | 19035686 | 60A13 | 60A16 | 42669  | 23 |
| <i>Df(2R)Exel9024</i> | w- | <i>e02793</i> | 19027378 | <i>d11424</i> | 19035686 | 60A16 | 60A16 | 8308   | 6  |
| <i>Df(2R)Exel6081</i> | w+ | <i>d02478</i> | 19077071 | <i>d06332</i> | 19337573 | 60B4  | 60C6  | 260502 | 63 |
| <i>Df(2R)Exel7184</i> | w- | <i>f02149</i> | 19182688 | <i>d09724</i> | 19301415 | 60B12 | 60C4  | 118727 | 15 |
| <i>Df(2R)Exel6082</i> | w+ | <i>d07955</i> | 19301440 | <i>d01376</i> | 19413346 | 60C4  | 60C7  | 111906 | 9  |
| <i>Df(2R)Exel6281</i> | w+ | <i>d05970</i> | 19301475 | <i>d01376</i> | 19413366 | 60C4  | 60C7  | 111891 | 9  |
| <i>Df(2R)Exel6278</i> | w+ | <i>d05976</i> | 19413453 | <i>d03814</i> | 19583470 | 60C7  | 60D4  | 170017 | 39 |
| <i>Df(2R)Exel9043</i> | w- | <i>e02285</i> | 19415971 | <i>d05357</i> | 19430995 | 60C7  | 60C7  | 15024  | 4  |
| <i>Df(2R)Exel7185</i> | w- | <i>d04388</i> | 19454631 | <i>f01329</i> | 19559227 | 60C8  | 60D3  | 104596 | 23 |
| <i>Df(3L)Exel6083</i> | w+ | <i>d10676</i> | 84918    | <i>d03734</i> | 160729   | 61A6  | 61B2  | 75811  | 16 |
| <i>Df(3L)Exel6084</i> | w+ | <i>d03734</i> | 160729   | <i>d05374</i> | 327487   | 61B2  | 61C1  | 166758 | 64 |
| <i>Df(3L)Exel9057</i> | w- | <i>f03039</i> | 286693   | <i>d09794</i> | 300135   | 61C1  | 61C1  | 13442  | 3  |
| <i>Df(3L)Exel6085</i> | w+ | <i>d10792</i> | 528975   | <i>d04382</i> | 729839   | 61C3  | 61C9  | 200864 | 29 |
| <i>Df(3L)Exel6086</i> | w+ | <i>d01152</i> | 730438   | <i>d03554</i> | 940280   | 61C9  | 61E1  | 209842 | 21 |
| <i>Df(3L)Exel6087</i> | w+ | <i>d00650</i> | 1459297  | <i>d11522</i> | 1567450  | 62A2  | 62A7  | 108153 | 35 |
| <i>Df(3L)Exel6088</i> | w+ | <i>d06594</i> | 1774835  | <i>d08551</i> | 1856713  | 62B4  | 62B7  | 81878  | 25 |
| <i>Df(3L)Exel6089</i> | w+ | <i>d05932</i> | 2132355  | <i>d02223</i> | 2236721  | 62D1  | 62D4  | 104366 | 19 |
| <i>Df(3L)Exel6090</i> | w+ | <i>d04304</i> | 2398068  | <i>d03461</i> | 2470786  | 62E2  | 62E4  | 72718  | 8  |
| <i>Df(3L)Exel6091</i> | w+ | <i>d01275</i> | 2636710  | <i>d00815</i> | 2801700  | 62E8  | 62F5  | 164990 | 15 |
| <i>Df(3L)Exel6092</i> | w+ | <i>d00815</i> | 2801700  | <i>d05405</i> | 3027783  | 62F5  | 63A3  | 226083 | 20 |
| <i>Df(3L)Exel6093</i> | w+ | <i>d03850</i> | 3231085  | <i>d04390</i> | 3398715  | 63C1  | 63D3  | 167630 | 43 |
| <i>Df(3L)Exel6094</i> | w+ | <i>d11183</i> | 3339746  | <i>d02986</i> | 3441195  | 63D2  | 63E1  | 101449 | 11 |
| <i>Df(3L)Exel6095</i> | w+ | <i>d02986</i> | 3441195  | <i>d07570</i> | 3525554  | 63E1  | 63E3  | 84359  | 12 |
| <i>Df(3L)Exel6096</i> | w+ | <i>d02960</i> | 3522849  | <i>d09231</i> | 3574487  | 63E3  | 63E4  | 51638  | 5  |
| <i>Df(3L)Exel6097</i> | w+ | <i>d07570</i> | 3525554  | <i>d07286</i> | 3805762  | 63E3  | 63F2  | 280208 | 23 |
| <i>Df(3L)Exel6098</i> | w+ | <i>d07286</i> | 3805762  | <i>d01762</i> | 3906112  | 63F2  | 63F7  | 100350 | 14 |
| <i>Df(3L)Exel6099</i> | w+ | <i>d01762</i> | 3906112  | <i>d00323</i> | 4054549  | 63F7  | 64A5  | 148437 | 33 |
| <i>Df(3L)Exel6100</i> | w+ | <i>d00323</i> | 4054549  | <i>d05349</i> | 4208063  | 64A5  | 64A10 | 153514 | 49 |
| <i>Df(3L)Exel9000</i> | w- | <i>d01988</i> | 4207870  | <i>e03141</i> | 4264889  | 64A10 | 64B1  | 57019  | 18 |
| <i>Df(3L)Exel8098</i> | w- | <i>f00997</i> | 4239946  | <i>d03308</i> | 4386723  | 64A12 | 64B6  | 146777 | 32 |
| <i>Df(3L)Exel9001</i> | w- | <i>f01896</i> | 4321820  | <i>d03308</i> | 4386723  | 64B2  | 64B6  | 64903  | 11 |

|                       |    |               |          |               |          |       |       |        |    |
|-----------------------|----|---------------|----------|---------------|----------|-------|-------|--------|----|
| <i>Df(3L)Exel6101</i> | w+ | <i>d01469</i> | 4364109  | <i>d05803</i> | 4519621  | 64B5  | 64B11 | 155512 | 33 |
| <i>Df(3L)Exel7208</i> | w- | <i>f00623</i> | 4487454  | <i>d03578</i> | 4670052  | 64B9  | 64B15 | 182598 | 22 |
| <i>Df(3L)Exel9028</i> | w+ | <i>e03493</i> | 4488223  | <i>f07287</i> | 4506042  | 64B9  | 64B11 | 17819  | 1  |
| <i>Df(3L)Exel6102</i> | w+ | <i>d06861</i> | 4670346  | <i>d08232</i> | 4954095  | 64B15 | 64C5  | 283749 | 23 |
| <i>Df(3L)Exel6103</i> | w+ | <i>d05468</i> | 4954344  | <i>d04953</i> | 5144105  | 64C5  | 64C10 | 189761 | 23 |
| <i>Df(3L)Exel6104</i> | w+ | <i>d04953</i> | 5144105  | <i>d00164</i> | 5325370  | 64C10 | 64D1  | 181265 | 12 |
| <i>Df(3L)Exel6105</i> | w+ | <i>d00164</i> | 5325370  | <i>d06605</i> | 5567299  | 64D1  | 64D6  | 241929 | 34 |
| <i>Df(3L)Exel6106</i> | w+ | <i>d06605</i> | 5567299  | <i>d08550</i> | 5650237  | 64D6  | 64E2  | 82938  | 5  |
| <i>Df(3L)Exel6107</i> | w+ | <i>d08114</i> | 5712191  | <i>d03136</i> | 5861823  | 64E5  | 64F5  | 149632 | 36 |
| <i>Df(3L)Exel7210</i> | w- | <i>d00629</i> | 5885881  | <i>f06725</i> | 6024728  | 65A1  | 65A5  | 138847 | 22 |
| <i>Df(3L)Exel8101</i> | w- | <i>f06976</i> | 6002148  | <i>d09462</i> | 6177575  | 65A3  | 65A9  | 175427 | 52 |
| <i>Df(3L)Exel6108</i> | w+ | <i>d09240</i> | 6177612  | <i>d08935</i> | 6223459  | 65A9  | 65A11 | 45847  | 6  |
| <i>Df(3L)Exel6109</i> | w+ | <i>d10135</i> | 6702563  | <i>d02991</i> | 6903076  | 65C3  | 65D3  | 200513 | 12 |
| <i>Df(3L)Exel6110</i> | w+ | <i>d04712</i> | 7054323  | <i>d06586</i> | 7115714  | 65E4  | 65E8  | 61391  | 13 |
| <i>Df(3L)Exel6111</i> | w+ | <i>d10766</i> | 7093965  | <i>d04468</i> | 7288267  | 65E7  | 65F4  | 194302 | 24 |
| <i>Df(3L)Exel8104</i> | w- | <i>d06935</i> | 7319524  | <i>f04930</i> | 7488461  | 65F7  | 66A4  | 168937 | 37 |
| <i>Df(3L)Exel6279</i> | w+ | <i>d02504</i> | 7828494  | <i>d04977</i> | 8055119  | 66A17 | 66B5  | 226625 | 31 |
| <i>Df(3L)Exel9034</i> | w+ | <i>e04443</i> | 7940663  | <i>e04081</i> | 8014087  | 66A22 | 66B3  | 73424  | 8  |
| <i>Df(3L)Exel6112</i> | w+ | <i>d04977</i> | 8055119  | <i>d10015</i> | 8317312  | 66B5  | 66C8  | 262193 | 76 |
| <i>Df(3L)Exel6113</i> | w+ | <i>d02541</i> | 8871536  | <i>d03759</i> | 9086548  | 66E3  | 66F5  | 215012 | 53 |
| <i>Df(3L)Exel6114</i> | w+ | <i>d01628</i> | 9466146  | <i>d05054</i> | 9652180  | 67B10 | 67C5  | 186034 | 32 |
| <i>Df(3L)Exel9048</i> | w+ | <i>f05904</i> | 9860432  | <i>f04913</i> | 9921347  | 67D1  | 67D2  | 60915  | 3  |
| <i>Df(3L)Exel6115</i> | w+ | <i>d04943</i> | 11779401 | <i>d01200</i> | 12039402 | 68E1  | 68F2  | 260001 | 47 |
| <i>Df(3L)Exel6116</i> | w+ | <i>d01200</i> | 12039402 | <i>d04297</i> | 12161522 | 68F2  | 69A2  | 122120 | 27 |
| <i>Df(3L)Exel6117</i> | w+ | <i>d10028</i> | 12585375 | <i>d09178</i> | 12747632 | 69D1  | 69E2  | 162257 | 23 |
| <i>Df(3L)Exel6261</i> | w+ | <i>d03151</i> | 12990045 | <i>d04160</i> | 13186051 | 69F6  | 70A3  | 196006 | 15 |
| <i>Df(3L)Exel6118</i> | w+ | <i>d04160</i> | 13186051 | <i>d06352</i> | 13304190 | 70A3  | 70A5  | 118139 | 5  |
| <i>Df(3L)Exel9017</i> | w- | <i>f07609</i> | 13415647 | <i>d09926</i> | 13434811 | 70B1  | 70B2  | 19164  | 6  |
| <i>Df(3L)Exel6119</i> | w+ | <i>d01713</i> | 13434596 | <i>d05021</i> | 13624373 | 70B2  | 70C2  | 189777 | 14 |
| <i>Df(3L)Exel6120</i> | w+ | <i>d06832</i> | 14008425 | <i>d06289</i> | 14139737 | 70D1  | 70D3  | 131312 | 11 |
| <i>Df(3L)Exel6121</i> | w+ | <i>d06289</i> | 14139737 | <i>d09765</i> | 14222043 | 70D3  | 70D4  | 82306  | 11 |
| <i>Df(3L)Exel6122</i> | w+ | <i>d09765</i> | 14222043 | <i>d03031</i> | 14358644 | 70D4  | 70D7  | 136601 | 6  |
| <i>Df(3L)Exel6123</i> | w+ | <i>d03031</i> | 14358644 | <i>d00705</i> | 14563262 | 70D7  | 70E4  | 204618 | 13 |
| <i>Df(3L)Exel6124</i> | w+ | <i>d00705</i> | 14563262 | <i>d03211</i> | 14704217 | 70E4  | 70F4  | 140955 | 22 |
| <i>Df(3L)Exel6126</i> | w+ | <i>d01414</i> | 14917172 | <i>d10223</i> | 15028466 | 71A3  | 71B3  | 111294 | 26 |
| <i>Df(3L)Exel6125</i> | w+ | <i>d10734</i> | 14917208 | <i>d10223</i> | 15028466 | 71A3  | 71B3  | 111258 | 26 |
| <i>Df(3L)Exel6262</i> | w+ | <i>d04931</i> | 15028321 | <i>d03813</i> | 15183338 | 71B3  | 71C1  | 155017 | 29 |
| <i>Df(3L)Exel6127</i> | w+ | <i>d00291</i> | 15995819 | <i>d03728</i> | 16078527 | 72D1  | 72D8  | 82708  | 23 |
| <i>Df(3L)Exel6128</i> | w+ | <i>d03728</i> | 16078527 | <i>d05116</i> | 16166201 | 72D8  | 72D10 | 87674  | 9  |
| <i>Df(3L)Exel6129</i> | w+ | <i>d02755</i> | 16360572 | <i>d06298</i> | 16432436 | 72F1  | 73A2  | 71864  | 7  |
| <i>Df(3L)Exel6130</i> | w+ | <i>d08619</i> | 16610165 | <i>d09764</i> | 16755473 | 73B5  | 73D1  | 145308 | 29 |
| <i>Df(3L)Exel9003</i> | w- | <i>d07815</i> | 16755454 | <i>f05277</i> | 16820438 | 73D1  | 73D4  | 64984  | 15 |
| <i>Df(3L)Exel9002</i> | w- | <i>d07815</i> | 16755454 | <i>f07000</i> | 16793729 | 73D1  | 73D1  | 38275  | 5  |
| <i>Df(3L)Exel9004</i> | w- | <i>f02787</i> | 16775106 | <i>d09236</i> | 16844220 | 73D1  | 73D5  | 69114  | 14 |
| <i>Df(3L)Exel7253</i> | w- | <i>f01879</i> | 16842815 | <i>d07939</i> | 16981180 | 73D5  | 73E4  | 138365 | 39 |
| <i>Df(3L)Exel6131</i> | w+ | <i>d04535</i> | 17187056 | <i>d05122</i> | 17370461 | 74A1  | 74B2  | 183405 | 25 |
| <i>Df(3L)Exel6132</i> | w+ | <i>d05122</i> | 17370461 | <i>d05808</i> | 17481906 | 74B2  | 74D2  | 111445 | 23 |
| <i>Df(3L)Exel9005</i> | w- | <i>d00172</i> | 17435988 | <i>f05921</i> | 17791446 | 74D1  | 75A6  | 355458 | 47 |
| <i>Df(3L)Exel9006</i> | w- | <i>f00655</i> | 17772531 | <i>d02182</i> | 17790321 | 75A4  | 75A6  | 17790  | 4  |
| <i>Df(3L)Exel6133</i> | w+ | <i>d06814</i> | 17965576 | <i>d04961</i> | 18088200 | 75B4  | 75B11 | 122624 | 12 |
| <i>Df(3L)Exel6134</i> | w+ | <i>d07712</i> | 18412069 | <i>d06314</i> | 18571329 | 75C7  | 75D4  | 159260 | 16 |

|                       |    |               |          |               |          |       |       |        |    |
|-----------------------|----|---------------|----------|---------------|----------|-------|-------|--------|----|
| <i>Df(3L)Exel9046</i> | w+ | <i>e02529</i> | 19240112 | <i>e00322</i> | 19279450 | 76A5  | 76A6  | 39338  | 12 |
| <i>Df(3L)Exel9007</i> | w- | <i>f06016</i> | 19373590 | <i>d04433</i> | 19585746 | 76B3  | 76B11 | 212156 | 46 |
| <i>Df(3L)Exel9008</i> | w- | <i>f01908</i> | 19415120 | <i>d04433</i> | 19585746 | 76B3  | 76B11 | 170626 | 43 |
| <i>Df(3L)Exel9009</i> | w- | <i>f07162</i> | 19459604 | <i>d04433</i> | 19585746 | 76B5  | 76B11 | 126142 | 30 |
| <i>Df(3L)Exel9011</i> | w- | <i>f00700</i> | 19532809 | <i>d04433</i> | 19585746 | 76B8  | 76B11 | 52937  | 20 |
| <i>Df(3L)Exel6135</i> | w+ | <i>d02376</i> | 19585782 | <i>d05142</i> | 19709572 | 76B11 | 76C4  | 123790 | 17 |
| <i>Df(3L)Exel9061</i> | w+ | <i>e03087</i> | 19669619 | <i>f00638</i> | 19679501 | 76C3  | 76C3  | 9882   | 2  |
| <i>Df(3L)Exel9045</i> | w+ | <i>e01986</i> | 19764159 | <i>e02826</i> | 19782458 | 76D1  | 76D2  | 18299  | 5  |
| <i>Df(3L)Exel6136</i> | w+ | <i>d00993</i> | 20228752 | <i>d01634</i> | 20411597 | 77B2  | 77C6  | 182845 | 58 |
| <i>Df(3L)Exel6137</i> | w+ | <i>d00158</i> | 21760691 | <i>d05482</i> | 21872248 | 78F4  | 79A4  | 111557 | 6  |
| <i>Df(3L)Exel6138</i> | w+ | <i>d07162</i> | 22185015 | <i>d02518</i> | 22325065 | 79D3  | 79E3  | 140050 | 11 |
| <i>Df(3L)Exel6139</i> | w+ | <i>d00290</i> | 22752317 | <i>d06496</i> | 22877429 | 80B1  | 80C2  | 125112 | 29 |
| <i>Df(3R)Exel6140</i> | w+ | <i>d09777</i> | 107285   | <i>d06355</i> | 186686   | 82A3  | 82A5  | 79401  | 26 |
| <i>Df(3R)Exel6141</i> | w+ | <i>d04429</i> | 288150   | <i>d03662</i> | 425261   | 82B3  | 82C4  | 137111 | 14 |
| <i>Df(3R)Exel6142</i> | w+ | <i>d05711</i> | 540103   | <i>d11220</i> | 632530   | 82D2  | 82D6  | 92427  | 18 |
| <i>Df(3R)Exel6143</i> | w+ | <i>d01923</i> | 776696   | <i>d04655</i> | 912501   | 82E4  | 82E8  | 135805 | 8  |
| <i>Df(3R)Exel9029</i> | w+ | <i>e00494</i> | 1229848  | <i>f00584</i> | 1263156  | 83A2  | 83A3  | 33308  | 4  |
| <i>Df(3R)Exel6144</i> | w+ | <i>d04649</i> | 1328465  | <i>d04523</i> | 1438442  | 83A6  | 83B6  | 109977 | 38 |
| <i>Df(3R)Exel7283</i> | w- | <i>d09140</i> | 1473758  | <i>e03430</i> | 1572399  | 83B7  | 83C2  | 98641  | 25 |
| <i>Df(3R)Exel6145</i> | w+ | <i>d09216</i> | 1542096  | <i>d11329</i> | 1638783  | 83C1  | 83C4  | 96687  | 28 |
| <i>Df(3R)Exel7284</i> | w- | <i>e01961</i> | 1641743  | <i>d09965</i> | 1833502  | 83C4  | 83D2  | 191759 | 34 |
| <i>Df(3R)Exel6146</i> | w+ | <i>d09165</i> | 2988384  | <i>d03054</i> | 3317334  | 84C8  | 84D9  | 328950 | 42 |
| <i>Df(3R)Exel6263</i> | w+ | <i>d09625</i> | 3792749  | <i>d11271</i> | 3945579  | 84E6  | 84E13 | 152830 | 23 |
| <i>Df(3R)Exel6147</i> | w+ | <i>d00091</i> | 4076046  | <i>d04921</i> | 4166658  | 84F6  | 84F13 | 90612  | 27 |
| <i>Df(3R)Exel6148</i> | w+ | <i>d05123</i> | 4159516  | <i>d04754</i> | 4303326  | 84F12 | 85A2  | 143810 | 20 |
| <i>Df(3R)Exel6149</i> | w+ | <i>d04754</i> | 4303326  | <i>d05108</i> | 4495369  | 85A2  | 85A5  | 192043 | 26 |
| <i>Df(3R)Exel8143</i> | w- | <i>d05884</i> | 4495359  | <i>e01288</i> | 4635805  | 85A5  | 85B2  | 140446 | 42 |
| <i>Df(3R)Exel6150</i> | w+ | <i>d05108</i> | 4495369  | <i>d06030</i> | 4753365  | 85A5  | 85B6  | 257996 | 53 |
| <i>Df(3R)Exel6258</i> | w+ | <i>d06030</i> | 4753365  | <i>d02926</i> | 4878300  | 85B6  | 85C3  | 124935 | 35 |
| <i>Df(3R)Exel6151</i> | w+ | <i>d02926</i> | 4878300  | <i>d04033</i> | 4983814  | 85C3  | 85C11 | 105514 | 8  |
| <i>Df(3R)Exel6152</i> | w+ | <i>d04033</i> | 4983814  | <i>d04746</i> | 5073164  | 85C11 | 85D2  | 89350  | 9  |
| <i>Df(3R)Exel6286</i> | w+ | <i>d05632</i> | 5073097  | <i>d01605</i> | 5220198  | 85D2  | 85D15 | 147101 | 34 |
| <i>Df(3R)Exel9036</i> | w+ | <i>f06147</i> | 5152648  | <i>f01859</i> | 5165744  | 85D11 | 85D11 | 13096  | 8  |
| <i>Df(3R)Exel6153</i> | w+ | <i>d11173</i> | 5338563  | <i>d06174</i> | 5457581  | 85D21 | 85E1  | 119018 | 38 |
| <i>Df(3R)Exel6264</i> | w+ | <i>d09105</i> | 5376187  | <i>d02109</i> | 5530688  | 85D24 | 85E5  | 154501 | 47 |
| <i>Df(3R)Exel6154</i> | w+ | <i>d10724</i> | 5619097  | <i>d05324</i> | 5754411  | 85E9  | 85F1  | 135314 | 12 |
| <i>Df(3R)Exel6155</i> | w+ | <i>d05324</i> | 5754411  | <i>d02882</i> | 5915198  | 85F1  | 85F10 | 160787 | 27 |
| <i>Df(3R)Exel6265</i> | w+ | <i>d02882</i> | 5915198  | <i>d09339</i> | 6015382  | 85F10 | 85F16 | 100184 | 22 |
| <i>Df(3R)Exel6156</i> | w+ | <i>d09339</i> | 6015382  | <i>d01533</i> | 6175785  | 85F16 | 86B1  | 160403 | 26 |
| <i>Df(3R)Exel6157</i> | w+ | <i>d01533</i> | 6175785  | <i>d08592</i> | 6209627  | 86B1  | 86B2  | 33842  | 2  |
| <i>Df(3R)Exel6266</i> | w+ | <i>d08592</i> | 6213237  | <i>d06865</i> | 6399638  | 86B3  | 86C2  | 186401 | 14 |
| <i>Df(3R)Exel6158</i> | w+ | <i>d06865</i> | 6399638  | <i>d03358</i> | 6464596  | 86C2  | 86C3  | 64958  | 4  |
| <i>Df(3R)Exel6159</i> | w+ | <i>d03358</i> | 6464596  | <i>d00735</i> | 6715088  | 86C3  | 86C7  | 250492 | 67 |
| <i>Df(3R)Exel7305</i> | w- | <i>f03403</i> | 6606222  | <i>d04974</i> | 6697995  | 86C6  | 86C7  | 91773  | 28 |
| <i>Df(3R)Exel7306</i> | w- | <i>e03397</i> | 6696606  | <i>d03858</i> | 6982490  | 86C7  | 86D7  | 285884 | 19 |
| <i>Df(3R)Exel8152</i> | w- | <i>e00862</i> | 6979586  | <i>d10159</i> | 7026014  | 86D7  | 86D9  | 46428  | 10 |
| <i>Df(3R)Exel7308</i> | w- | <i>d02538</i> | 7069653  | <i>f07849</i> | 7264779  | 86E1  | 86E8  | 195126 | 26 |
| <i>Df(3R)Exel9018</i> | w- | <i>f02579</i> | 7103606  | <i>d08193</i> | 7178879  | 86E2  | 86E4  | 75273  | 3  |
| <i>Df(3R)Exel6160</i> | w+ | <i>d10710</i> | 7179003  | <i>d00626</i> | 7394952  | 86E4  | 86E14 | 215949 | 37 |
| <i>Df(3R)Exel8153</i> | w- | <i>e00749</i> | 7261651  | <i>d05981</i> | 7394905  | 86E8  | 86E14 | 133254 | 22 |
| <i>Df(3R)Exel6276</i> | w+ | <i>d01657</i> | 7394904  | <i>d05705</i> | 7495409  | 86E14 | 86E18 | 100505 | 28 |

|                       |    |               |          |               |          |       |       |        |    |
|-----------------------|----|---------------|----------|---------------|----------|-------|-------|--------|----|
| <i>Df(3R)Exel6161</i> | w+ | <i>d00626</i> | 7394952  | <i>d05705</i> | 7495409  | 86E14 | 86E18 | 100457 | 28 |
| <i>Df(3R)Exel8154</i> | w- | <i>d09404</i> | 7472871  | <i>e02063</i> | 7585229  | 86E17 | 86F6  | 112358 | 27 |
| <i>Df(3R)Exel7309</i> | w- | <i>d09404</i> | 7472871  | <i>f05722</i> | 7541776  | 86E17 | 86F1  | 68905  | 19 |
| <i>Df(3R)Exel9019</i> | w- | <i>f03367</i> | 7575337  | <i>d08552</i> | 7590141  | 86F6  | 86F7  | 14804  | 2  |
| <i>Df(3R)Exel7310</i> | w- | <i>d02257</i> | 7584271  | <i>e00215</i> | 7712793  | 86F6  | 87A1  | 128522 | 25 |
| <i>Df(3R)Exel6163</i> | w+ | <i>d01944</i> | 7712866  | <i>d11490</i> | 7824986  | 87A1  | 87A4  | 112120 | 38 |
| <i>Df(3R)Exel6162</i> | w+ | <i>d03738</i> | 7713402  | <i>d05939</i> | 8106825  | 87A1  | 87B5  | 393423 | 73 |
| <i>Df(3R)Exel7312</i> | w- | <i>e01881</i> | 7803599  | <i>d11617</i> | 7905862  | 87A4  | 87A7  | 102263 | 33 |
| <i>Df(3R)Exel8155</i> | w- | <i>d02777</i> | 7819284  | <i>f00748</i> | 7939233  | 87A4  | 87A9  | 119949 | 17 |
| <i>Df(3R)Exel7313</i> | w- | <i>f06020</i> | 7933857  | <i>d09898</i> | 8106492  | 87A9  | 87B5  | 172635 | 22 |
| <i>Df(3R)Exel7314</i> | w- | <i>e01417</i> | 8061010  | <i>d00872</i> | 8198575  | 87B3  | 87B8  | 137565 | 20 |
| <i>Df(3R)Exel6164</i> | w+ | <i>d02075</i> | 8106825  | <i>d01972</i> | 8268490  | 87B5  | 87B10 | 161665 | 52 |
| <i>Df(3R)Exel6165</i> | w+ | <i>d05939</i> | 8106825  | <i>d01972</i> | 8268490  | 87B5  | 87B10 | 161665 | 52 |
| <i>Df(3R)Exel7315</i> | w- | <i>d04829</i> | 8194850  | <i>f00706</i> | 8239875  | 87B8  | 87B9  | 45025  | 24 |
| <i>Df(3R)Exel7316</i> | w- | <i>f01799</i> | 8231675  | <i>d09383</i> | 8274627  | 87B9  | 87B11 | 42952  | 21 |
| <i>Df(3R)Exel7317</i> | w- | <i>d09614</i> | 8266959  | <i>f03771</i> | 8456337  | 87B10 | 87C3  | 189378 | 28 |
| <i>Df(3R)Exel8156</i> | w- | <i>e03672</i> | 8456285  | <i>d06811</i> | 8504578  | 87C3  | 87C5  | 48293  | 11 |
| <i>Df(3R)Exel6166</i> | w+ | <i>d06811</i> | 8504578  | <i>d11354</i> | 8546460  | 87C5  | 87C7  | 41882  | 14 |
| <i>Df(3R)Exel7318</i> | w- | <i>e03104</i> | 8549596  | <i>d09746</i> | 8800146  | 87C7  | 87D5  | 250550 | 19 |
| <i>Df(3R)Exel8157</i> | w- | <i>d07231</i> | 8838454  | <i>e03149</i> | 8877531  | 87D8  | 87D10 | 39077  | 14 |
| <i>Df(3R)Exel6167</i> | w+ | <i>d08957</i> | 8876908  | <i>d05009</i> | 9084960  | 87D10 | 87E3  | 208052 | 14 |
| <i>Df(3R)Exel8158</i> | w- | <i>f05696</i> | 9067507  | <i>d04286</i> | 9189980  | 87E3  | 87E7  | 122473 | 22 |
| <i>Df(3R)Exel6168</i> | w+ | <i>d05739</i> | 9105429  | <i>d05343</i> | 9205526  | 87E3  | 87E8  | 100097 | 27 |
| <i>Df(3R)Exel7320</i> | w- | <i>e03199</i> | 9206766  | <i>d00355</i> | 9369382  | 87E8  | 87F2  | 162616 | 22 |
| <i>Df(3R)Exel6169</i> | w+ | <i>d00355</i> | 9369382  | <i>d07513</i> | 9509692  | 87F2  | 87F10 | 140310 | 38 |
| <i>Df(3R)Exel6170</i> | w+ | <i>d00827</i> | 9509907  | <i>d08451</i> | 9638553  | 87F10 | 87F14 | 128646 | 30 |
| <i>Df(3R)Exel6288</i> | w+ | <i>d08451</i> | 9638553  | <i>d06006</i> | 9809255  | 87F14 | 88A4  | 170702 | 18 |
| <i>Df(3R)Exel6171</i> | w+ | <i>d01991</i> | 9638639  | <i>d06006</i> | 9809255  | 87F14 | 88A4  | 170616 | 18 |
| <i>Df(3R)Exel7359</i> | w- | <i>d06006</i> | 9809255  | <i>f05002</i> | 10085129 | 88A4  | 88B1  | 275874 | 36 |
| <i>Df(3R)Exel7321</i> | w- | <i>f07279</i> | 9951213  | <i>d00566</i> | 10103879 | 88A9  | 88B1  | 152666 | 24 |
| <i>Df(3R)Exel6267</i> | w+ | <i>d01042</i> | 10103460 | <i>d04326</i> | 10307535 | 88B1  | 88C2  | 204075 | 30 |
| <i>Df(3R)Exel8160</i> | w- | <i>f00608</i> | 10475121 | <i>d10739</i> | 10701635 | 88C10 | 88D6  | 226514 | 27 |
| <i>Df(3R)Exel6275</i> | w+ | <i>d05870</i> | 10549363 | <i>d04005</i> | 10743994 | 88D1  | 88D7  | 194631 | 32 |
| <i>Df(3R)Exel6172</i> | w+ | <i>d00072</i> | 10643757 | <i>d04005</i> | 10743994 | 88D5  | 88D7  | 100237 | 18 |
| <i>Df(3R)Exel6173</i> | w+ | <i>d04005</i> | 10743994 | <i>d03533</i> | 10920238 | 88D7  | 88E1  | 176244 | 7  |
| <i>Df(3R)Exel7323</i> | w- | <i>f01752</i> | 11045834 | <i>d00962</i> | 11117494 | 88E3  | 88E12 | 71660  | 39 |
| <i>Df(3R)Exel6174</i> | w+ | <i>d01616</i> | 11154373 | <i>d00763</i> | 11363185 | 88F1  | 88F7  | 208812 | 49 |
| <i>Df(3R)Exel7326</i> | w- | <i>d02119</i> | 11363141 | <i>e01249</i> | 11619040 | 88F7  | 89A5  | 255899 | 24 |
| <i>Df(3R)Exel6175</i> | w+ | <i>d03302</i> | 11491766 | <i>d06065</i> | 11746700 | 89A1  | 89A8  | 254934 | 48 |
| <i>Df(3R)Exel8162</i> | w- | <i>f05971</i> | 11618212 | <i>d05718</i> | 11727202 | 89A5  | 89A8  | 108990 | 28 |
| <i>Df(3R)Exel7327</i> | w- | <i>d01695</i> | 11727182 | <i>f00591</i> | 11867301 | 89A8  | 89B3  | 140119 | 32 |
| <i>Df(3R)Exel7328</i> | w- | <i>f02570</i> | 11835143 | <i>d00953</i> | 11983197 | 89B1  | 89B9  | 148054 | 24 |
| <i>Df(3R)Exel6268</i> | w+ | <i>d09073</i> | 11983486 | <i>d08557</i> | 12131294 | 89B9  | 89B17 | 147808 | 20 |
| <i>Df(3R)Exel7329</i> | w- | <i>d01524</i> | 12067152 | <i>f00467</i> | 12184315 | 89B14 | 89B19 | 117163 | 25 |
| <i>Df(3R)Exel6269</i> | w+ | <i>d08557</i> | 12131294 | <i>d01746</i> | 12328350 | 89B17 | 89D2  | 197056 | 41 |
| <i>Df(3R)Exel7330</i> | w- | <i>d06928</i> | 12177467 | <i>f03467</i> | 12298670 | 89B19 | 89D2  | 121203 | 23 |
| <i>Df(3R)Exel9055</i> | w- | <i>d02472</i> | 12274903 | <i>e00329</i> | 12279433 | 89C7  | 89C7  | 4530   | 2  |
| <i>Df(3R)Exel8163</i> | w- | <i>e01821</i> | 12298630 | <i>d02299</i> | 12328350 | 89D2  | 89D2  | 29720  | 8  |
| <i>Df(3R)Exel6270</i> | w+ | <i>d01746</i> | 12328350 | <i>d00281</i> | 12528622 | 89D2  | 89D8  | 200272 | 35 |
| <i>Df(3R)Exel8165</i> | w- | <i>f03089</i> | 12838705 | <i>d03600</i> | 12879667 | 89E8  | 89E11 | 40962  | 8  |
| <i>Df(3R)Exel6176</i> | w+ | <i>d06981</i> | 12879395 | <i>d05816</i> | 12974744 | 89E11 | 89F1  | 95349  | 29 |

|                       |    |               |          |               |          |       |       |        |    |
|-----------------------|----|---------------|----------|---------------|----------|-------|-------|--------|----|
| <i>Df(3R)Exel6177</i> | w+ | <i>d10487</i> | 13430526 | <i>d04118</i> | 13620279 | 90B6  | 90C5  | 189753 | 34 |
| <i>Df(3R)Exel6287</i> | w+ | <i>d10164</i> | 13875251 | <i>d06187</i> | 13992148 | 90E1  | 90E7  | 116897 | 11 |
| <i>Df(3R)Exel6178</i> | w+ | <i>d06187</i> | 13992148 | <i>d01578</i> | 14223109 | 90E7  | 91A5  | 230961 | 72 |
| <i>Df(3R)Exel6179</i> | w+ | <i>d03314</i> | 14223259 | <i>d01551</i> | 14409970 | 91A5  | 91B5  | 186711 | 21 |
| <i>Df(3R)Exel6180</i> | w+ | <i>d01551</i> | 14409970 | <i>d06384</i> | 14566034 | 91B5  | 91C5  | 156064 | 34 |
| <i>Df(3R)Exel9030</i> | w+ | <i>e03260</i> | 14420735 | <i>f07251</i> | 14448184 | 91B5  | 91B6  | 27449  | 5  |
| <i>Df(3R)Exel6181</i> | w+ | <i>d06384</i> | 14566034 | <i>d06938</i> | 14749756 | 91C5  | 91D5  | 183722 | 22 |
| <i>Df(3R)Exel6182</i> | w+ | <i>d06938</i> | 14749756 | <i>d03824</i> | 14853107 | 91D5  | 91E4  | 103351 | 19 |
| <i>Df(3R)Exel6183</i> | w+ | <i>d03824</i> | 14853107 | <i>d01249</i> | 14989538 | 91E4  | 91F8  | 136431 | 21 |
| <i>Df(3R)Exel6184</i> | w+ | <i>d07105</i> | 15289196 | <i>d03742</i> | 15467056 | 92A5  | 92A11 | 177860 | 17 |
| <i>Df(3R)Exel6271</i> | w+ | <i>d04626</i> | 16030598 | <i>d06110</i> | 16135266 | 92D5  | 92E2  | 104668 | 9  |
| <i>Df(3R)Exel6185</i> | w+ | <i>d06110</i> | 16135266 | <i>d06416</i> | 16376404 | 92E2  | 92F1  | 241138 | 27 |
| <i>Df(3R)Exel6272</i> | w+ | <i>d11226</i> | 16783150 | <i>d06987</i> | 16938067 | 93A7  | 93B13 | 154917 | 32 |
| <i>Df(3R)Exel6186</i> | w+ | <i>d06413</i> | 17435102 | <i>d06757</i> | 17536460 | 93E6  | 93F1  | 101358 | 7  |
| <i>Df(3R)Exel6187</i> | w+ | <i>d06757</i> | 17536460 | <i>d01510</i> | 17691795 | 93F1  | 93F8  | 155335 | 29 |
| <i>Df(3R)Exel6188</i> | w+ | <i>d01510</i> | 17691795 | <i>d04633</i> | 17859422 | 93F8  | 93F14 | 167627 | 35 |
| <i>Df(3R)Exel6189</i> | w+ | <i>d04633</i> | 17859422 | <i>d09130</i> | 17950445 | 93F14 | 94A2  | 91023  | 11 |
| <i>Df(3R)Exel6190</i> | w+ | <i>d11528</i> | 17950466 | <i>d05959</i> | 18184665 | 94A2  | 94A9  | 234199 | 26 |
| <i>Df(3R)Exel6191</i> | w+ | <i>d05959</i> | 18184665 | <i>d10314</i> | 18347158 | 94A9  | 94B2  | 162493 | 41 |
| <i>Df(3R)Exel6273</i> | w+ | <i>d10314</i> | 18347158 | <i>d02163</i> | 18483022 | 94B2  | 94B11 | 135864 | 29 |
| <i>Df(3R)Exel6192</i> | w+ | <i>d02163</i> | 18483022 | <i>d01494</i> | 18715446 | 94B11 | 94D3  | 232424 | 37 |
| <i>Df(3R)Exel6193</i> | w+ | <i>d07567</i> | 18715437 | <i>d06598</i> | 18991827 | 94D3  | 94E4  | 276390 | 42 |
| <i>Df(3R)Exel6274</i> | w+ | <i>d06598</i> | 18991827 | <i>d02978</i> | 19111693 | 94E4  | 94E11 | 119866 | 29 |
| <i>Df(3R)Exel6280</i> | w+ | <i>d04513</i> | 19007553 | <i>d02978</i> | 19111713 | 94E5  | 94E11 | 104160 | 23 |
| <i>Df(3R)Exel9012</i> | w- | <i>f03380</i> | 19096101 | <i>d05036</i> | 19162766 | 94E9  | 94E13 | 66665  | 9  |
| <i>Df(3R)Exel6194</i> | w+ | <i>d02454</i> | 19201551 | <i>d07988</i> | 19457785 | 94F1  | 95A4  | 256234 | 24 |
| <i>Df(3R)Exel6195</i> | w+ | <i>d07988</i> | 19457785 | <i>d10327</i> | 19540223 | 95A4  | 95B1  | 82438  | 23 |
| <i>Df(3R)Exel9013</i> | w- | <i>d07467</i> | 19538990 | <i>f06027</i> | 19601223 | 95B1  | 95B5  | 62233  | 23 |
| <i>Df(3R)Exel9014</i> | w- | <i>f07143</i> | 19589469 | <i>d08449</i> | 19759221 | 95B1  | 95D1  | 169752 | 24 |
| <i>Df(3R)Exel6196</i> | w+ | <i>d05180</i> | 19738513 | <i>d06493</i> | 19847746 | 95C12 | 95D8  | 109233 | 31 |
| <i>Df(3R)Exel6197</i> | w+ | <i>d06493</i> | 19847746 | <i>d01966</i> | 19957689 | 95D8  | 95E5  | 109943 | 32 |
| <i>Df(3R)Exel6198</i> | w+ | <i>d01966</i> | 19957689 | <i>d02406</i> | 20087564 | 95E5  | 95F8  | 129875 | 37 |
| <i>Df(3R)Exel8178</i> | w- | <i>d02406</i> | 20087564 | <i>f07191</i> | 20344004 | 95F8  | 96A6  | 256440 | 45 |
| <i>Df(3R)Exel6199</i> | w+ | <i>d02406</i> | 20087564 | <i>d10672</i> | 20266334 | 95F8  | 96A2  | 178770 | 36 |
| <i>Df(3R)Exel7357</i> | w- | <i>d10672</i> | 20266334 | <i>f07662</i> | 20467345 | 96A2  | 96A13 | 201011 | 34 |
| <i>Df(3R)Exel6200</i> | w+ | <i>d01692</i> | 20585659 | <i>d01133</i> | 20711044 | 96A20 | 96B4  | 125385 | 37 |
| <i>Df(3R)Exel6201</i> | w+ | <i>d09496</i> | 20954191 | <i>d01461</i> | 21013337 | 96C2  | 96C4  | 59146  | 6  |
| <i>Df(3R)Exel9056</i> | w- | <i>d01461</i> | 21013337 | <i>f03439</i> | 21025528 | 96C4  | 96C5  | 12191  | 1  |
| <i>Df(3R)Exel6202</i> | w+ | <i>d06042</i> | 21109192 | <i>d02001</i> | 21330985 | 96D1  | 96E2  | 221793 | 40 |
| <i>Df(3R)Exel6203</i> | w+ | <i>d02001</i> | 21330985 | <i>d10152</i> | 21452957 | 96E2  | 96E6  | 121972 | 13 |
| <i>Df(3R)Exel6204</i> | w+ | <i>d06732</i> | 21821129 | <i>d07992</i> | 22076527 | 96F9  | 97A6  | 255398 | 39 |
| <i>Df(3R)Exel6205</i> | w+ | <i>d01582</i> | 22790892 | <i>d03691</i> | 22885112 | 97D12 | 97E1  | 94220  | 31 |
| <i>Df(3R)Exel6207</i> | w+ | <i>d03691</i> | 22885112 | <i>d08487</i> | 23068603 | 97E1  | 97E11 | 183491 | 51 |
| <i>Df(3R)Exel6206</i> | w+ | <i>d03691</i> | 22885112 | <i>d11068</i> | 22972567 | 97E1  | 97E5  | 87455  | 27 |
| <i>Df(3R)Exel6208</i> | w+ | <i>d11068</i> | 22972567 | <i>d08487</i> | 23068603 | 97E5  | 97E11 | 96036  | 25 |
| <i>Df(3R)Exel6259</i> | w+ | <i>d07135</i> | 24142019 | <i>d05172</i> | 24416263 | 98C4  | 98D6  | 274244 | 23 |
| <i>Df(3R)Exel6209</i> | w+ | <i>d05172</i> | 24416263 | <i>d08071</i> | 24490049 | 98D6  | 98E1  | 73786  | 12 |
| <i>Df(3R)Exel6210</i> | w+ | <i>d08071</i> | 24490049 | <i>d01446</i> | 24805838 | 98E1  | 98F5  | 315789 | 38 |
| <i>Df(3R)Exel6211</i> | w+ | <i>d01446</i> | 24805838 | <i>d03620</i> | 24879353 | 98F5  | 98F6  | 73515  | 17 |
| <i>Df(3R)Exel6212</i> | w+ | <i>d03906</i> | 25030264 | <i>d01580</i> | 25103140 | 99A1  | 99A5  | 72876  | 16 |
| <i>Df(3R)Exel9025</i> | w+ | <i>e00989</i> | 25559829 | <i>d02238</i> | 25575231 | 99B10 | 99B10 | 15402  | 7  |

|                       |    |               |          |               |          |       |       |        |    |
|-----------------------|----|---------------|----------|---------------|----------|-------|-------|--------|----|
| <i>Df(3R)Exel6213</i> | w+ | <i>d05202</i> | 25692183 | <i>d05928</i> | 25827755 | 99C5  | 99D1  | 135572 | 33 |
| <i>Df(3R)Exel6214</i> | w+ | <i>d07550</i> | 25914470 | <i>d00274</i> | 26017969 | 99D5  | 99E2  | 103499 | 23 |
| <i>Df(3R)Exel6215</i> | w+ | <i>d04476</i> | 26280966 | <i>d00898</i> | 26378570 | 99F6  | 99F8  | 97604  | 23 |
| <i>Df(3R)Exel6216</i> | w+ | <i>d06377</i> | 26281105 | <i>d05931</i> | 26347557 | 99F6  | 99F7  | 66452  | 18 |
| <i>Df(3R)Exel7378</i> | w- | <i>f06991</i> | 26377966 | <i>d03508</i> | 26610037 | 99F8  | 100A5 | 232071 | 37 |
| <i>Df(3R)Exel8194</i> | w- | <i>f02576</i> | 26571483 | <i>d06073</i> | 26703211 | 100A4 | 100A7 | 131728 | 18 |
| <i>Df(3R)Exel9020</i> | w- | <i>f02576</i> | 26571483 | <i>d03508</i> | 26610037 | 100A4 | 100A5 | 38554  | 3  |
| <i>Df(3R)Exel6217</i> | w+ | <i>d10131</i> | 26635749 | <i>d06073</i> | 26703211 | 100A6 | 100A7 | 67462  | 14 |
| <i>Df(3R)Exel6260</i> | w+ | <i>d06073</i> | 26703211 | <i>d06562</i> | 26984224 | 100A7 | 100B2 | 281013 | 31 |
| <i>Df(3R)Exel7379</i> | w- | <i>f02650</i> | 26917412 | <i>d08362</i> | 27037034 | 100B2 | 100B3 | 119622 | 20 |
| <i>Df(3R)Exel6218</i> | w+ | <i>d06562</i> | 26984224 | <i>d03123</i> | 27126307 | 100B2 | 100B4 | 142083 | 26 |
| <i>Df(3R)Exel6219</i> | w+ | <i>d03123</i> | 27126307 | <i>d11276</i> | 27277252 | 100B4 | 100B8 | 150945 | 14 |
| <i>Df(3R)Exel6220</i> | w+ | <i>d03769</i> | 27504487 | <i>d01226</i> | 27627929 | 100C1 | 100C3 | 123442 | 40 |
